# Supplementary material
Source: publisher figshare collection journal article supplement (https://diabetesjournals.figshare.com/ndownloader/files/39522472)
Supplement: Supplementary file 1 [file 39522472]

## Sheet: Raw RNASeq analyses
Supplemental Table 3
Raw RNASeq data
gene_symbol	log_fc_value	FDR
C1qtnf1	7.57876	1.15615e-72
Tcfl5	8.41871	1.22861e-70
Ugt1a1	5.22873	9.87998e-65
Snhg11	3.26277	1.83808e-52
Gm11747	7.82191	1.46891e-51
Tmem59l	3.57494	2.02308e-49
Kctd17	2.56635	1.97641e-43
Col9a3	5.02654	6.72838e-37
Ambp	2.91518	1.0443e-34
Bcan	8.34912	6.66517e-34
Ccdc13	4.7079	2.54871e-32
Foxl3	3.23922	2.22299e-31
Tmie	4.24994	9.10782e-30
Higd1a	5.26056	1.54631e-29
Fetub	4.38634	5.75326e-29
Asphd2	4.87518	1.22581e-27
Prss23os	3.77084	8.70058e-27
Krt87	4.23356	7.38789e-26
Slc6a13	8.8237	2.13832e-25
Gstm3	5.61227	3.55992e-25
Gpbar1	6.63725	8.17995e-25
Timp2	2.1186	1.39697e-23
Scarf2	2.51611	2.57412e-23
Lrtm2	4.02122	6.51612e-23
Endou	6.02663	2.4113e-22
Cyp4f39	-2.26455	4.40415e-22
Klhdc8b	1.92839	1.14615e-21
H2-M10.1	11.5771	1.89497e-21
Prss23	3.63411	2.32595e-21
Csn3	8.01663	5.27258e-21
Lhpp	3.17091	5.99095e-21
Adgrf3	4.65262	1.02022e-20
Gpr27	-2.23045	2.94869e-20
Kif12	-1.68079	3.70018e-20
Tesc	3.19535	9.8755e-20
BC039966	5.01207	1.05834e-19
Plin3	2.82676	1.8079e-19
Catsperd	2.47032	5.1792e-19
Col5a3	9.6602	9.45592e-19
Als2cl	3.43524	9.75558e-19
Adamtsl5	4.48493	2.31676e-18
Syt11	1.53353	6.07135e-18
Zfp773	3.05568	1.14358e-17
Ntrk1	3.87085	1.23008e-17
Lgi3	3.33385	1.44614e-17
Dsc2	-2.01175	2.35415e-17
Ifitm2	4.30166	2.74243e-17
Tmed6	3.27398	2.8655e-17
E230016K23Rik	5.9016	2.95747e-17
Mctp1	-2.09103	3.91368e-17
Nlgn3	3.76592	5.54545e-17
Gm45623	-4.06955	9.38494e-17
Cd248	6.13528	1.0183e-16
Cd81	3.00054	1.8852e-16
P4ha2	2.69945	4.41349e-16
Serinc2	2.72212	4.71616e-16
Arnt2	2.89444	4.85238e-16
Slc15a3	2.00325	5.12444e-16
Arl5c	2.67083	1.06429e-15
Gm10865	1.62412	1.06429e-15
Tmprss4	1.40434	1.09445e-15
Svopl	2.49122	1.27546e-15
Abcg4	4.1448	2.04187e-15
R74862	2.82833	2.05158e-15
Gas6	3.07194	2.49892e-15
C1rl	2.72148	3.2027e-15
Lipk	4.98174	3.59264e-15
Serpina7	3.08415	4.04369e-15
Ces1d	3.29036	4.33617e-15
Tubb4a	2.80328	4.45635e-15
Smoc1	3.54023	5.10361e-15
Mapkapk3	1.99077	8.06816e-15
Faim2	9.12444	1.42927e-14
Mmel1	6.95664	1.65568e-14
Spsb4	2.48771	1.98619e-14
Cacna2d4	4.58964	2.40781e-14
Msln	-2.74714	2.40781e-14
Zfp783	-2.16578	2.40781e-14
Gm15577	-3.90133	2.44276e-14
Sh3d21	-2.33084	2.6053e-14
Ppm1j	4.02698	3.23782e-14
Fsd1	4.35979	3.49989e-14
Chad	5.57625	4.29262e-14
Rph3a	-4.89035	5.85767e-14
Cln5	-1.34227	1.18665e-13
Btnl7-ps	5.34319	1.23996e-13
Ptprr	-1.09922	1.34701e-13
Gm17099	1.47735	1.40596e-13
Pcolce2	2.44141	1.88043e-13
Abhd11os	2.21241	2.40654e-13
Gm47112	6.62451	3.25392e-13
Dock8	-3.14405	3.43128e-13
Prss41	3.16518	3.52393e-13
H2-M10.4	9.25505	3.77171e-13
Chga	-1.14588	3.81966e-13
Smim24	2.90663	5.17313e-13
Gm34759	-1.86832	5.45208e-13
Gal	5.09817	6.63603e-13
Prrt3	2.32362	6.68463e-13
Slc6a12	8.6363	6.97741e-13
Ct55	5.22382	8.56673e-13
Galnt9	1.67728	1.23057e-12
Ttc21a	3.61285	1.25068e-12
Necab2	3.34139	1.40815e-12
Adarb1	-1.38118	1.49527e-12
Proc	2.78674	1.57623e-12
Apod	3.02667	2.34965e-12
Triobp	1.34747	2.50765e-12
Emp2	3.29757	3.08501e-12
Trpm3	-1.54025	3.89413e-12
Pcolce	4.29606	5.22368e-12
Dtx4	3.42631	6.7855e-12
Zcchc12	1.73156	6.83972e-12
Pipox	5.09105	7.44825e-12
Gm9195	5.36515	8.72342e-12
Rras	2.49787	9.79774e-12
Caly	3.13966	1.0685e-11
Pdlim4	4.87773	1.15104e-11
Tbc1d2	-2.00115	1.31702e-11
Gstm7	2.69287	1.32687e-11
Plekhf1	4.25313	1.43322e-11
Lrrn2	-2.17367	2.06065e-11
Aspg	7.72788	2.95433e-11
Col13a1	6.78528	2.96744e-11
Kit	3.537	3.02925e-11
Maged2	2.07318	3.03484e-11
Gm37738	3.96144	3.22574e-11
Atg9b	3.2491	3.36364e-11
Arhgef4	1.92619	3.4513e-11
Cerox1	6.3733	3.61102e-11
Galnt16	3.389	3.83746e-11
Egf	-1.67292	3.85912e-11
Pigr	3.82995	4.22636e-11
Slc35f3	4.80975	4.47266e-11
Slit1	-3.31804	4.61973e-11
Tmem132a	1.89608	4.81374e-11
Mamld1	2.42205	4.81374e-11
Thrsp	3.94345	4.96943e-11
Gm5134	4.99857	5.58249e-11
Platr14	3.39215	5.89031e-11
Zfyve28	3.62398	6.08205e-11
Tmem82	3.56652	6.08205e-11
Slc44a4	3.13032	6.73299e-11
Irak3	2.64864	7.13555e-11
Pcdhga2	2.51432	7.59911e-11
Parp3	2.60724	8.45548e-11
Gstm2	3.19195	8.77122e-11
Tmem179	4.06493	9.71721e-11
Myo7b	4.4896	9.9814e-11
Gpx6	8.9848	1.25704e-10
Cd40	4.36091	1.5577e-10
Mfng	2.75265	1.69134e-10
Mycl	2.82523	1.69134e-10
Slc6a20a	2.5216	1.69205e-10
Slc2a10	3.06863	1.84929e-10
Slc28a2b	-2.46895	1.98975e-10
1700128E19Rik	5.12854	2.05117e-10
Itgad	-2.56177	2.18119e-10
Nnat	3.29086	2.41643e-10
Irs3	4.45512	2.47337e-10
Th	2.4105	2.61555e-10
Cacng3	4.93563	2.69368e-10
F2	1.2226	2.93356e-10
Ece2	2.18509	3.07641e-10
Gm13003	-1.70806	3.1367e-10
Slc1a7	4.42505	3.41713e-10
Cftr	-3.89278	3.41713e-10
Slc18b1	-1.53327	3.59705e-10
Lipo3	1.35343	3.6619e-10
Gm31126	7.20372	4.28174e-10
Oxtr	-3.71318	5.00552e-10
Sdsl	-2.67658	5.60531e-10
Acy3	6.45885	5.7041e-10
Cdc25b	1.39374	6.30656e-10
Mylk	-4.42615	6.49213e-10
Ptprd	-1.88853	8.16293e-10
Rassf2	2.65648	8.87827e-10
Dnm1	2.18324	9.79343e-10
Plk5	2.39381	1.06789e-09
Slc22a18	2.65667	1.09768e-09
Endod1	-1.47438	1.10967e-09
Ptprtos	7.68609	1.11293e-09
Fam20a	-1.85091	1.20057e-09
Tph1	-3.63062	1.20057e-09
Igkv6-15	23.0315	1.20057e-09
Epdr1	-2.32072	1.37165e-09
Gm10605	3.27738	1.44484e-09
Pla2g7	3.54331	1.45298e-09
Lbp	4.40548	1.62963e-09
Srbd1	-2.32372	1.6834e-09
Paqr4	1.24571	2.12572e-09
Renbp	3.46111	2.17946e-09
Tdrkh	-1.65996	2.17946e-09
Gm44148	1.4173	2.19486e-09
Plin5	4.50254	2.21124e-09
Apof	3.28882	2.24879e-09
H2-M10.5	8.22036	2.27868e-09
Tspear	2.37386	2.33872e-09
1700001C19Rik	3.09396	2.46235e-09
AI507597	3.99551	2.49846e-09
Pfkfb3	2.39278	2.51233e-09
Ggact	-1.00343	3.08053e-09
Cd82	1.37628	3.68795e-09
Usp18	1.34277	3.76158e-09
Ephb6	-4.49627	4.2161e-09
Rnf112	2.41165	5.33424e-09
Slc38a3	4.03229	5.58445e-09
Kcnn2	1.30269	5.70849e-09
Zdhhc14	-1.47204	5.77606e-09
Serpina1b	5.79245	5.96019e-09
Cnrip1	1.39979	6.19202e-09
Pam	0.836329	6.49259e-09
1700048O20Rik	5.67131	6.88881e-09
Igkv19-93	22.0679	7.28977e-09
Gm15753	2.29982	7.99707e-09
Serpina1a	5.06192	9.09859e-09
Sdc1	3.23462	9.62567e-09
Rapgef3	3.49048	9.62567e-09
D130043K22Rik	-1.3406	1.27897e-08
Kirrel3	-1.83708	1.31859e-08
Itih5l-ps	4.63345	1.35004e-08
Igfbp5	-2.64511	1.41715e-08
Ceacam1	2.31365	1.61085e-08
Gsg1l	7.91102	1.64427e-08
Celf2	-1.40038	1.66262e-08
Gm43127	3.80091	1.69443e-08
Alox8	1.5064	1.72405e-08
Ffar4	1.5451	1.73032e-08
Ighv5-9-1	21.5953	1.73192e-08
Syngr3	2.46846	1.99327e-08
Igsf8	1.12882	2.21958e-08
Frmd4b	-1.34735	2.22201e-08
Pacc1	-1.15556	2.30277e-08
Grm4	4.05386	2.54101e-08
5033406O09Rik	3.60293	2.72509e-08
Cep192	-1.35959	2.75486e-08
Alb	5.0382	2.78265e-08
Ctxn3	21.331	2.78862e-08
1700017B05Rik	1.14079	2.93017e-08
Adam11	2.98212	2.95101e-08
Tmem252	4.45119	3.06618e-08
Glipr2	2.89939	3.19467e-08
Prok1	-2.75127	3.29524e-08
Bcar3	2.69379	3.30458e-08
Agfg2	1.36894	3.30654e-08
Top1mt	2.72428	3.41812e-08
Acss1	3.69704	3.45837e-08
Gna15	3.26487	3.45837e-08
Serpini1	-0.836537	3.46632e-08
Star	2.3208	4.41584e-08
Tmem221	2.66275	4.41584e-08
Ndrg4	1.25526	4.70657e-08
Card10	2.82275	4.90216e-08
Map2k6	-1.83823	4.90389e-08
Asb9	3.56803	4.90389e-08
Aox1	-1.96232	4.90389e-08
Rnls	1.99612	4.93413e-08
Zfp945	1.01752	4.93975e-08
Ceacam10	1.65766	5.07842e-08
Ltbp2	1.98642	5.31112e-08
Gm2115	2.37375	5.31112e-08
Fmo1	-1.86174	5.39213e-08
Fads2	2.2151	5.43774e-08
Rflna	-1.59746	5.50172e-08
H2bu2	2.25923	5.50831e-08
Chst1	4.97592	5.55222e-08
Fut11	0.957123	5.67561e-08
Lsmem1	-2.98164	5.92717e-08
Pnma2	2.02284	6.10237e-08
Map3k6	3.09636	7.62305e-08
Gm23134	3.65093	8.53943e-08
Dennd4c	-1.30035	8.68804e-08
Camta1	1.88232	8.7595e-08
Rptoros	1.55191	8.81728e-08
Aatk	2.25762	8.83631e-08
Gtsf1l	6.7157	8.84741e-08
Oat	2.00972	9.10644e-08
Gpr137b-ps	-1.01	9.43596e-08
Slc25a10	1.47077	9.55979e-08
Gm12224	1.11804	9.99956e-08
Zdhhc22	-1.97739	1.0915e-07
Myo7a	-1.39333	1.1769e-07
Xlr3c	4.44242	1.21288e-07
Gm48684	5.30908	1.21989e-07
Trp53i11	2.16474	1.40386e-07
Gm35019	3.4468	1.47137e-07
Zfp580	1.7992	1.47974e-07
D030045P18Rik	6.36793	1.4959e-07
Gm17163	5.42458	1.50854e-07
Zfp811	2.41273	1.68998e-07
Trf	3.96605	1.78743e-07
Kcnk3	2.4301	1.80812e-07
Spon1	-3.65714	1.92877e-07
Lhx6	3.39453	1.93715e-07
Mkrn3	3.08163	1.96835e-07
Kcna7	5.91027	2.00702e-07
Gm11532	2.52847	2.07118e-07
Sh2d3c	1.43223	2.18719e-07
Gm10425	2.40537	2.31009e-07
Cald1	-1.21319	2.61453e-07
Gstm6	5.00628	2.61453e-07
Jag2	1.69346	2.68096e-07
Lrrc24	1.17242	2.6984e-07
Pygo1	-3.32024	2.88327e-07
Reep2	0.966925	2.97384e-07
N4bp2os	2.12708	2.97384e-07
Pnck	1.89829	3.02915e-07
Elavl3	6.97744	3.15666e-07
Tspan14	-1.42305	3.24691e-07
Tagln3	3.4314	3.47953e-07
Rasd2	3.50457	3.76869e-07
Chil1	3.5036	3.81902e-07
Limk2	-1.01363	3.82716e-07
Gm16010	2.17458	3.82716e-07
Syt10	-5.65241	3.98966e-07
Fam107a	5.78322	4.46876e-07
Gm11788	1.75843	4.46876e-07
D030018L15Rik	5.18175	4.85434e-07
Chst13	4.61081	4.88976e-07
Cpne5	3.34192	5.12883e-07
Penk	2.48809	5.12883e-07
Pirt	7.99253	5.15965e-07
Fhit	-1.40088	5.15965e-07
Sstr5	6.12352	5.23301e-07
Naprt	2.11603	5.24641e-07
Cyp2s1	3.67021	5.592e-07
Gm42697	-1.82658	5.75067e-07
Xlr3d-ps	6.92682	6.14666e-07
Gpr26	-2.35234	6.3051e-07
Gng3	1.14939	6.3051e-07
Tpbgl	2.75165	6.43927e-07
Gm38336	2.10682	6.64358e-07
Dppa1	-3.06585	7.03566e-07
Arl4c	3.23325	7.25913e-07
Ttc28	-1.3964	7.44599e-07
Mroh2a	-1.68403	7.53433e-07
2700054A10Rik	1.97793	7.53433e-07
Csta2	6.75329	8.04254e-07
Cox6b2	3.50354	8.16061e-07
Gm33474	7.21682	8.22412e-07
Gm30873	3.49988	8.78602e-07
Chd4	-1.04428	9.0316e-07
Rdh1	3.59941	9.12949e-07
Slc5a5	3.33115	9.1366e-07
Abcc6	7.22976	9.3639e-07
Tnfrsf11a	-1.67675	1.04255e-06
Gm27168	-2.51412	1.08463e-06
Gm11981	6.4001	1.17273e-06
Prob1	1.28319	1.19038e-06
Qpct	2.42677	1.20803e-06
Pafah2	-1.26656	1.25537e-06
Sp6	2.67178	1.31092e-06
Cd96	-2.11909	1.31563e-06
Adam15	1.72326	1.31881e-06
Hhatl	2.31905	1.32803e-06
Cnga3	6.7356	1.38195e-06
Olfr330	-4.20882	1.38195e-06
Plg	7.86539	1.40401e-06
Igf2	5.70363	1.41097e-06
Kcnj13	3.37551	1.43092e-06
Tnfaip2	3.17018	1.59365e-06
Adgrf1	-4.87385	1.63123e-06
Sgk3	-0.924212	1.70027e-06
Phgdh	1.1421	1.84306e-06
Lncenc1	5.32778	2.03767e-06
Nos1	2.49346	2.04415e-06
Mtrr	-1.15324	2.09255e-06
Cers1	3.06737	2.09255e-06
Otoa	2.81902	2.11739e-06
Gm10030	3.54487	2.11739e-06
Cdc42ep5	2.40814	2.16201e-06
Gm3772	-1.73486	2.20107e-06
Tmem150c	-0.927567	2.21741e-06
Cxcl13	6.06662	2.24038e-06
Ddc	-0.872698	2.27342e-06
Calca	2.95316	2.27342e-06
Scn1b	2.95157	2.37702e-06
Acvr1c	-1.87612	2.49804e-06
Lonrf2	-2.43829	2.50574e-06
Myo15b	1.92653	2.54729e-06
Map1a	1.40409	2.58891e-06
Gm20528	1.73997	2.59534e-06
Lrp10	0.711993	2.63592e-06
Ccn3	3.58331	2.71368e-06
Garnl3	-1.48317	2.72304e-06
Pid1	-1.80053	2.72826e-06
Srsf12	1.41489	2.78272e-06
Mgll	3.78597	2.82922e-06
Abcc3	2.19596	2.86195e-06
Maob	-0.975284	2.889e-06
A1bg	6.95872	2.92961e-06
2610528J11Rik	1.91957	2.92961e-06
Prss32	3.22486	3.14837e-06
A630076J17Rik	-3.04205	3.22618e-06
Gys2	4.54895	3.3701e-06
Mfsd13a	-0.869286	3.43915e-06
Slc26a3	1.8989	3.46742e-06
Ntrk3	-1.92795	3.48254e-06
4731419I09Rik	1.75763	3.49727e-06
Galnt12	-0.792488	3.49912e-06
Bmp7	2.85295	3.58822e-06
Rhoc	1.38744	3.6242e-06
H4c3	1.85169	3.80543e-06
Zfp462	-1.40876	3.95632e-06
Hspb8	2.42167	4.06543e-06
Plpp2	1.3549	4.48972e-06
Fmo2	-1.81783	4.57264e-06
Zfp692	-1.02841	4.61292e-06
Serpina1c	7.02517	4.69479e-06
Kcnh2	1.00604	4.95072e-06
Gm9924	4.69007	5.21054e-06
Tmem255b	3.07343	5.3461e-06
Racgap1	-1.0402	5.3938e-06
Pitrm1	-0.823038	5.53157e-06
Ttbk1	3.82731	5.71899e-06
Mapk12	2.51553	5.71899e-06
Gm17210	3.45762	5.96736e-06
Crhr2	3.1276	6.0483e-06
Cdkn1c	2.69074	6.0483e-06
Gpr155	1.86567	6.0483e-06
Hmgb3	1.32225	6.09663e-06
Tmem37	2.91954	6.09716e-06
Unc93b1	1.1575	6.8802e-06
Gucy2c	1.45124	6.8802e-06
Ckmt1	1.0647	6.93498e-06
Nmnat1	-1.67925	6.97622e-06
Mgam	3.28175	6.97622e-06
Kl	-1.57681	7.1727e-06
Gm14133	-3.63325	7.1727e-06
Tgfb1	3.07962	7.18264e-06
Lpcat4	1.6205	7.40004e-06
Vps8	-1.37111	7.51328e-06
H1f10	1.75627	7.67252e-06
Gm49314	5.81767	7.68061e-06
Ngef	1.6962	7.68364e-06
Dlk1	2.60805	8.0079e-06
Slc16a11	1.18638	8.12365e-06
Fmnl1	1.82633	8.79975e-06
Lpl	-1.18103	8.87194e-06
Klhl40	2.99324	8.91386e-06
Foxq1	-6.97281	9.10069e-06
Spats2l	-5.22262	9.22413e-06
Gask1a	5.93232	9.23023e-06
Acte1	-6.45633	9.35311e-06
Adgrb2	6.76157	9.50101e-06
Acsl6	1.02509	9.78041e-06
Gm13709	1.8844	9.93191e-06
Rdh16f1	5.29787	1.01391e-05
Jph4	1.25086	1.03668e-05
Cdh8	-1.55506	1.04041e-05
Klf15	2.21445	1.04344e-05
Scnn1a	2.32325	1.08753e-05
Lrrc75a	1.05894	1.08753e-05
Eef1a2	3.83662	1.10041e-05
AI854703	3.64203	1.12663e-05
Nr0b2	3.95002	1.16076e-05
Hyal1	1.38727	1.1811e-05
Aldob	1.79694	1.1811e-05
Erich3	-0.959941	1.2003e-05
Idnk	1.03973	1.22973e-05
Rom1	1.24901	1.24405e-05
Gm37583	-2.83651	1.25858e-05
Tapbp	0.860282	1.27961e-05
Trpv6	-6.09085	1.35676e-05
Ly6e	1.33087	1.3999e-05
Rbp4	2.16755	1.42333e-05
Qrsl1	-1.33073	1.43393e-05
Isyna1	1.36851	1.4381e-05
Lbhd2	7.20953	1.45176e-05
Cadm1	1.83802	1.47528e-05
Phactr3	-1.61651	1.5162e-05
Krt90	2.10273	1.53942e-05
Lactbl1	-2.77386	1.55856e-05
Zbtb46	3.27688	1.61528e-05
Col5a2	-5.28793	1.63671e-05
Ccdc74a	-2.87574	1.63915e-05
Hpca	4.13457	1.67349e-05
Dph6	-0.826816	1.69906e-05
B3gnt7	2.87535	1.722e-05
Fpgt	-1.30648	1.81349e-05
Tmem215	-0.955081	1.8187e-05
Mat1a	-1.40676	1.85647e-05
Gnat1	2.70993	1.86814e-05
Gm38285	3.32411	1.98265e-05
Rimkla	-1.00776	1.98422e-05
4931431B13Rik	-2.64261	2.0085e-05
Plek	1.06497	2.07204e-05
Fkbp9	-0.775367	2.07204e-05
Ldlrad4	-0.884928	2.11668e-05
Rab19	-1.1467	2.13114e-05
Arhgef10l	2.59084	2.14796e-05
Gm10366	0.799972	2.18396e-05
Akap1	-1.27789	2.2555e-05
Rin1	4.21313	2.2556e-05
Gaa	0.702444	2.28778e-05
B430119L08Rik	5.78933	2.30313e-05
Tph2	-0.927268	2.30915e-05
Spo11	6.60301	2.34109e-05
Pnpla3	2.07891	2.36641e-05
Gm2614	-3.01281	2.4215e-05
C430042M11Rik	3.04493	2.54083e-05
Nr4a2	-2.1823	2.64722e-05
C2cd4a	-1.72304	2.65251e-05
Cdh7	-1.166	2.69568e-05
Gm39460	3.35392	2.87948e-05
Efcab5	-2.66072	2.88981e-05
Fam172a	-0.88869	2.88983e-05
Neu2	2.01068	2.96711e-05
Gm36742	-4.00137	2.9729e-05
4930402D18Rik	6.32852	2.99885e-05
Dnah8	-2.31061	3.09273e-05
Myh7	3.98755	3.11967e-05
Dock3	1.15253	3.13319e-05
Slc35g1	-0.851717	3.18336e-05
Kcp	2.92221	3.25176e-05
Hspb6	1.77044	3.30753e-05
Mamstr	3.98254	3.30975e-05
Cldn8	-2.1698	3.41647e-05
Cspg5	-1.76511	3.47047e-05
Prodh	2.90979	3.47085e-05
Agt	1.99477	3.48708e-05
9230117E06Rik	2.49861	3.48708e-05
Rab32	2.52445	3.58566e-05
4930404N11Rik	0.98864	3.60414e-05
Snx31	4.10358	3.67525e-05
Gm27167	-2.13461	3.76284e-05
Gm19412	0.850883	3.81962e-05
Jakmip2	3.62428	3.89833e-05
Slc10a4-ps	-2.38876	3.90378e-05
Adcy1	4.30621	4.01922e-05
Sipa1	1.54005	4.06085e-05
Spr	1.29012	4.10034e-05
Smarca4	-0.557141	4.12142e-05
Gpx3	1.80445	4.13594e-05
Serpinh1	1.48941	4.17426e-05
Il10rb	1.20231	4.21702e-05
Myo5a	-1.52011	4.31688e-05
Nmnat2	2.53538	4.35366e-05
Des	3.11446	4.47722e-05
Nccrp1	6.18599	4.54474e-05
Edaradd	-1.65933	4.63909e-05
Flywch2	1.68039	4.66502e-05
Spic	-2.68477	4.84791e-05
Incenp	-1.29099	4.89766e-05
Clip4	2.23047	4.91872e-05
Best1	3.45627	4.92839e-05
Septin4	2.01082	4.94864e-05
1810007C17Rik	2.42047	5.05072e-05
Zfp467	1.66234	5.08369e-05
Ighmbp2	-0.763623	5.10761e-05
Gm7765	7.13762	5.18307e-05
Gm17767	-1.54521	5.58616e-05
Gas2	-1.35562	5.59726e-05
Matk	1.69059	5.60134e-05
Fmo4	-1.4653	5.67382e-05
Tcte2	1.35548	5.81085e-05
C330022C24Rik	2.74647	6.03492e-05
Gm40578	3.08162	6.05958e-05
Ttll5	-1.09859	6.14413e-05
Cyp46a1	1.67532	6.30241e-05
Exoc3l4	2.07673	6.36775e-05
Insig2	0.638327	6.41967e-05
Cd68	2.01049	6.6246e-05
Uroc1	3.38074	6.63594e-05
Tcp11	1.69955	6.63594e-05
Cyp2j12	-5.88765	6.63594e-05
Rhobtb1	-0.820585	6.78622e-05
Fcer1g	2.03649	6.78622e-05
Gpr6	-3.42145	6.80553e-05
Cpz	6.58346	6.84818e-05
Gm9937	-1.88485	7.15956e-05
Cntn3	-2.55645	7.19786e-05
Efhd1	3.75607	7.23842e-05
Fam102b	2.12291	7.45428e-05
Tmem108	0.956048	7.4571e-05
Fuca2	0.93938	7.76002e-05
Medag	-2.18624	7.76002e-05
Hspa2	-1.53292	7.79954e-05
Oas3	3.05758	7.81465e-05
Gm17120	2.49025	7.85327e-05
Speg	1.70921	8.00071e-05
B130021K23Rik	1.88687	8.01391e-05
Rasa4	-2.68143	8.01528e-05
Rhox5	6.19569	8.0913e-05
Rhox3f	3.77397	8.40226e-05
Syde2	-1.30526	8.47191e-05
Cacna2d2	2.44879	8.57919e-05
Gba	0.587056	8.66268e-05
Kcnj1	4.01791	8.80689e-05
Fgfrl1	2.71851	9.20079e-05
Pgap6	-0.755012	9.2038e-05
Klhdc8a	1.97967	9.2038e-05
Nr1i2	2.65117	9.28502e-05
6330403K07Rik	2.83152	9.69978e-05
Tmem229b	-1.14807	9.69978e-05
Gpd1	0.649937	0.000100333
Wipi1	-1.24281	0.000102076
Cd79a	2.50433	0.000103184
Ndn	0.682468	0.000103632
Nuggc	2.39381	0.000105785
Jakmip3	5.69489	0.000107903
Tmem30b	0.764247	0.000109315
Synpr	-0.90427	0.000110363
Gm47163	0.768904	0.000112121
D030047H15Rik	1.99795	0.000113245
Pm20d2	-1.79961	0.000113585
Nyap2	2.23732	0.00011607
Gm44850	-2.96576	0.00011607
Shisa4	1.6982	0.000116393
Adam32	-2.54006	0.000119443
Gm14302	1.73383	0.000123877
Pnpla6	-0.866106	0.00012445
Gpr179	3.22869	0.000125702
Gm4889	3.97507	0.000127075
Gm16537	0.671271	0.000127554
Ush1g	2.15443	0.000129204
Prr15l	1.60817	0.000129401
Gm5371	8.9756	0.000130027
Fam189a2	-1.29653	0.000132608
Gm9790	5.68647	0.000134494
3222401L13Rik	1.30986	0.000135875
Sntg2	-2.91052	0.000135944
Cracdl	1.6157	0.000138214
Crip1	1.02083	0.000139928
F7	3.79265	0.000140844
Gm26588	5.61255	0.000149539
Gng7	1.55972	0.000151592
Kcnt1	3.14646	0.000151592
Robo3	3.98221	0.000151787
Tsga10	-1.42897	0.000151853
Alcam	0.733399	0.000151898
Gm50218	2.09145	0.000154599
Rreb1	-1.28971	0.000159702
Pxmp2	2.28492	0.000162393
Slc34a1	3.88032	0.000162703
1700066B19Rik	2.52799	0.000165741
Cndp2	-0.708508	0.000166755
Kcna5	2.3462	0.000166755
Gm16731	1.32049	0.000173864
Nt5c3	-0.617177	0.000174422
Onecut2	2.00862	0.000181462
Otop3	4.4929	0.000188732
Mucl2	6.34585	0.000188732
Rhpn1	1.21286	0.000189685
Nfam1	2.15806	0.000191685
Camk1d	1.21959	0.000193914
Notch2	-2.92922	0.000197271
P2rx6	1.24466	0.000203483
Mgarp	2.9986	0.000203483
Plcxd1	1.21484	0.000203483
Cend1	4.41129	0.000204317
A830012C17Rik	2.29061	0.000204317
6330410L21Rik	-1.4973	0.000206788
C78197	3.55628	0.000207934
Hcn2	0.66461	0.000209948
Pde1b	1.3108	0.000210863
B4galt2	1.33752	0.000210863
Pdzk1ip1	1.41505	0.000213676
Gdpd5	3.3077	0.000213727
Sertm1	-5.48502	0.000213727
Gm48127	1.48023	0.000213824
Urah	2.31807	0.000217931
Kif26a	4.57867	0.000218336
Tmem125	1.3211	0.000218336
Mta2	0.536279	0.000222751
Cacna1h	2.35984	0.000224214
Atp1a3	2.63426	0.000224214
Cdkl3	-1.78415	0.00022463
Golga7b	1.64695	0.000227848
Slc22a3	6.30744	0.000229993
Slc23a4	-1.92846	0.000231044
Pbld2	1.21126	0.00023153
Sil1	-1.02635	0.000238707
Thbd	-1.54969	0.000242144
Cfap46	1.20779	0.000245108
Lrrc9	3.46279	0.00024582
Serpinf1	3.50066	0.00024919
Osbpl6	-1.35942	0.000250218
Gm1673	2.03809	0.000250218
Frmpd4	2.84607	0.000257207
Gstp1	1.35623	0.00025791
Scg2	1.09718	0.00025975
Adam23	1.63877	0.000261692
Tbc1d4	-1.42249	0.000261692
Suclg2	-1.0099	0.000261692
Chmp4c	-0.804504	0.000262547
Vsir	2.77385	0.000265543
Chn1	-1.11369	0.000265691
Gm21057	3.74503	0.00027447
Trim46	0.837186	0.000274906
Zfp704	-0.659568	0.00027991
Arhgdig	1.179	0.000284643
Nat14	1.11731	0.000286763
Ric8b	0.743177	0.000292256
Rab34	0.945416	0.000292378
Gm23952	5.97938	0.000294165
Tpd52l1	1.14052	0.000296366
1700110K17Rik	1.48868	0.000297169
Pcdhac2	-1.75537	0.000332167
Rasl10b	1.74866	0.000342878
Gm16984	1.46	0.000343142
Ube2ql1	2.21925	0.000343653
Gm24017	6.45707	0.000345671
Dpy19l3	-1.09089	0.000346396
Fbxw17	0.712131	0.000347026
Pbld1	3.2395	0.000348638
Epha7	-1.66943	0.000354335
Psmb10	1.28889	0.000355604
Necab3	2.51314	0.000368136
Zfyve16	-0.795595	0.000368373
Myh3	6.27046	0.000371131
Serp2	1.65544	0.000372063
A230065N10Rik	1.73393	0.000372063
Pigl	-0.723687	0.000373485
B3gnt9	1.23056	0.0003784
Sod3	2.54774	0.000379318
Lyn	1.54108	0.000379834
Rrm1	-0.882236	0.000386303
Flnc	3.08773	0.000397099
Ttc39b	-0.848636	0.000402381
Gm45640	-2.42613	0.000404069
Hdac7	1.64892	0.000406313
Plet1os	2.1972	0.000407812
Vangl1	-2.64629	0.00042421
Fer1l6	1.25878	0.000424927
Enpp1	3.08472	0.00043185
Smarcal1	-0.631078	0.000432521
Adssl1	1.88298	0.000436498
Gm15677	4.67253	0.000436498
Ttc36	2.49	0.000448202
4632427E13Rik	0.704609	0.000459612
Prr23a3	3.83715	0.000459612
A530084C06Rik	-5.9602	0.000465326
Pcdha9	-1.7435	0.000471778
Epm2aip1	-0.812348	0.00047296
Rab6a	-0.79258	0.000473854
Podxl2	0.943657	0.000484983
Abcb4	-1.68096	0.000486174
Marcks	0.834366	0.000488858
Gm15612	0.861854	0.000488858
Gm13645	1.96176	0.000494694
C6	3.41575	0.000495329
Fbxo27	0.868065	0.000498258
Igdcc4	1.4316	0.000501513
Npy	-2.73794	0.000505391
Insyn1	-5.36245	0.000509687
Zfp354c	1.20096	0.000511671
Slc25a40	-0.862686	0.000513712
Chn1os1	-1.39555	0.000513712
Ube2q1	0.548283	0.000517476
Them4	-0.976594	0.000523877
Got1	0.652645	0.000534886
Gm31557	-2.71505	0.000541454
Gm19510	1.53929	0.000549162
Epas1	4.04952	0.000553602
Idh1	0.958993	0.000554192
Sh2d5	1.07074	0.000559532
Zfp345	5.59176	0.000565464
Gm26571	1.34143	0.000571821
Apob	-2.51841	0.000581733
Cd47	0.673671	0.0005885
Ak8	1.8761	0.000592057
2010315B03Rik	0.706384	0.000595549
Plxna4	5.64996	0.000599449
Actn3	2.18568	0.000615012
Ubash3b	-1.7732	0.000615012
Cdk18	1.24957	0.000615334
Pgap3	-0.998286	0.000616231
Taok3	-0.549635	0.000616231
5930403N24Rik	1.67412	0.000618557
Gm13703	1.6288	0.00062572
Dse	-2.20922	0.000635381
Dmtn	1.53764	0.000639174
Srgap1	-1.14641	0.000643499
Gm11945	2.06755	0.000643499
Aff3	2.05137	0.000653087
Reep1	1.46707	0.000654252
Rhov	1.65698	0.000664834
Mboat7	0.819054	0.000665305
Abhd5	-0.690508	0.000689298
Hjurp	-0.995082	0.000696637
Gm10010	-2.3703	0.000703327
Gm49066	1.34449	0.000703327
Tmem47	-2.54388	0.000709792
Rem2	1.49866	0.0007215
Nedd9	-1.38706	0.000725591
Wdyhv1	0.65729	0.000726896
Lyve1	1.3932	0.00072877
Samd13	1.56041	0.00072877
Eci2	1.41503	0.000731684
Rps24	-0.709688	0.000731684
Myh6	4.89649	0.000731684
Gm40773	3.42667	0.000731684
Cit	1.98606	0.000731977
Nos3	2.01159	0.000732209
Slc7a9	5.24339	0.000733944
Atcay	3.77452	0.00074383
Selenon	-0.83569	0.00074383
Cpt1c	0.981007	0.000745123
Entpd2	-0.992225	0.000752127
Col8a1	4.21362	0.00075931
Angptl4	4.28484	0.000773138
Prkcd	0.621985	0.00078062
Gm27191	5.35918	0.000781
Hpn	2.27195	0.000781491
Mov10	0.77785	0.000781491
Cntfr	2.25404	0.0007866
Bcat1	-1.53577	0.0007866
Riox2	-0.626323	0.000787683
Tspan6	1.00422	0.000790074
Cc2d2b	-0.809115	0.000801806
Ssbp4	0.780434	0.000802096
Mipol1	-1.06959	0.000803005
Kirrel2	2.12119	0.00081826
Rgs8	3.10849	0.0008304
Ugdh	-0.686653	0.000837807
Pla1a	2.35424	0.000858744
Me3	1.4311	0.000866473
Gfra2	6.18348	0.000878552
Clu	1.10834	0.000879456
Fgf12	0.808533	0.000904742
Gnmt	1.88287	0.000906512
Fbxl2	-0.593184	0.000911758
Vgf	1.73895	0.000921221
Krt71	5.75647	0.000921221
Camkk1	1.40564	0.00092203
Oas2	1.39073	0.00092203
Atp1b2	1.26837	0.00092203
Gm46447	2.90278	0.00092203
Pappa	1.82272	0.000923174
Trpm2	-1.44627	0.000924146
Aldh1b1	-1.67315	0.000929034
Fxyd6	0.919508	0.000933447
Hsd17b13	2.80564	0.000938156
Gt(ROSA)26Sor	0.646331	0.000939323
Gm16143	1.19305	0.000955394
Gm35721	3.25997	0.000960215
Lipc	5.37675	0.000964455
Pou3f4	4.18034	0.00096862
Pms1	-1.31767	0.000970347
Plch1	-0.921102	0.000970347
Slc9a7	-0.758111	0.000971469
Gm5105	1.10884	0.000975656
Gsn	-1.02429	0.000978564
Scube2	-2.39255	0.000985375
Dock6	0.934656	0.00098571
Cyp2j6	0.716116	0.000987157
Ctsz	1.15879	0.00100695
App	-1.04876	0.00100695
Tmem86a	0.976898	0.00102674
Ift122	-1.19698	0.00104681
E230001N04Rik	1.86062	0.00104749
Gm49593	2.35175	0.00104749
Mafa	-1.51825	0.00105419
Neurl1a	1.69166	0.00105755
Abcd2	1.07999	0.00106302
Slc39a10	-1.04714	0.00106769
Pebp1	-0.548699	0.00107109
Dhx34	-0.658447	0.00107372
Samd14	1.63981	0.00107372
Gm9899	2.55671	0.00107465
Syndig1	-1.53507	0.00108614
Sfrp1	4.14347	0.00110208
Gm28321	4.45369	0.00110208
Pdgfra	5.8559	0.00110396
Sccpdh	1.0367	0.00110396
Serpine1	2.27479	0.0011072
Nmnat3	-1.22994	0.00110904
Pstpip2	-1.02715	0.00112772
Zfp57	4.09449	0.00113778
Gm50186	2.82807	0.00113778
Shisal2b	-1.26082	0.00116976
Rhox3b-ps	2.49797	0.00119794
Gm36839	1.84845	0.00119862
Car10	-1.15106	0.00120873
Ppm1m	1.23578	0.00122635
Gm15510	1.1199	0.00122735
Gm42656	-5.63316	0.00122735
Fhad1	1.26154	0.00124658
Ugp2	0.582421	0.00127109
Zbtb7a	0.547399	0.00128338
Pwwp3b	0.984413	0.00128338
Cyb5r3	0.928017	0.00128355
Tmprss9	1.63394	0.00128355
Ccdc184	0.859759	0.00129477
Sdc2	-0.921993	0.00132781
Cdin1	-0.980773	0.00133039
Cntn6	5.6996	0.00134509
Gm16835	0.8199	0.00134509
Gm47235	-4.12628	0.00136805
Mfsd12	0.826136	0.00137312
Pcmt1	0.821991	0.00137618
Ccdc160	1.2255	0.00137768
Tnfrsf13b	3.65335	0.00137983
Tcf7l1	1.34349	0.00138563
Mtmr7	0.489378	0.00140159
Tmem130	0.837088	0.00141038
Nfyb	0.581576	0.0014247
Mageh1	0.634738	0.0014247
Psd4	-1.36729	0.00143895
Rasal1	1.52059	0.00144018
Wdr86	-2.18947	0.00144272
Zfta	0.837872	0.00144542
Pygb	-1.14609	0.00145954
Slc25a47	1.66177	0.00145982
Prr5	2.93172	0.00148353
Tnr	-1.29107	0.00151722
Nefh	0.976819	0.00153973
Adora1	0.830136	0.00153983
Gyg	-0.925431	0.00156062
Gm32913	5.42469	0.00156062
Kcnq2	1.84255	0.0015743
Lhfpl1	4.14168	0.0015743
Spon2	2.0124	0.00158818
Ppif	0.986518	0.00159806
Gm43597	1.81611	0.00162024
Pde5a	-0.897972	0.00162656
Lrrc75aos2	0.955153	0.00165011
Ubtf	-0.65945	0.00167876
Otog	5.38191	0.00172002
Casq2	-4.28923	0.00172281
Glis1	2.62394	0.00174254
ENSMUSG00000080812	-4.98826	0.00174254
Gm15945	2.67307	0.00178491
Cym	-2.04624	0.00179447
Tm6sf2	2.53903	0.00179623
Tcp11l2	0.940392	0.00180885
Psat1	1.18921	0.00180885
Kcns3	5.1058	0.00181017
Tmem72	3.90277	0.00184127
Lonrf3	-2.10086	0.00185031
Fam219a	-0.737894	0.00185418
Limd2	1.17977	0.00185418
Sptlc1	-0.480822	0.00185686
Mab21l4	4.33801	0.00185686
Kcnd1	1.02552	0.00189346
Pbx4	1.87536	0.00191032
Wnt9a	1.6065	0.00193734
Gm47398	2.23701	0.00193734
1500009C09Rik	6.33282	0.00194901
Pde7b	-1.19667	0.00196333
Gm26738	-1.07995	0.00196333
Ppifos	0.998012	0.00196333
Gnl2	-0.746306	0.00196538
Crtap	-1.29677	0.00196538
Tenm2	-1.14214	0.00196538
Camk2n2	1.2613	0.00196615
Plxdc2	-1.62814	0.00198072
Il17rc	0.701381	0.00203384
A730017L22Rik	-0.885016	0.00203413
Dnah9	1.38193	0.00204931
Cstad	2.36051	0.00206712
Clip3	1.2871	0.00209084
Mgat4a	-1.63882	0.00209084
Tuba8	1.83397	0.00209591
Gm45613	4.89983	0.00210811
Lcp1	-1.37749	0.00211714
Gm16897	1.25703	0.00212933
Tinagl1	4.24245	0.00214216
Rapgef5	-2.27073	0.00214857
Abcg1	0.649633	0.00216302
Gm49975	2.04618	0.00216675
Aldh3b1	1.41841	0.00218348
Iglon5	3.84829	0.00218811
Lvrn	-4.76393	0.00218811
Trim62	0.781082	0.00219877
Bace2	-0.632504	0.00220104
Shd	3.63018	0.002205
Hpse	3.0785	0.0022053
Lmo1	1.76435	0.0022053
Kcng3	-1.09174	0.0022053
Gdpd1	0.51627	0.0022053
Lipo2	3.70427	0.0022053
Cdk19	-0.987723	0.00222076
Gm31518	1.8218	0.00226006
Sardh	5.42031	0.00226639
Kctd12b	-1.52362	0.00227548
Art5	3.63171	0.00228218
Ccdc163	-1.05618	0.00230008
Nabp1	-1.27552	0.00230025
Gsdmd	1.79329	0.00230207
Pink1	0.699285	0.00231079
Lpar2	2.31174	0.00231773
Cavin1	1.80306	0.00232084
Trim38	-2.48875	0.00232084
Rhox3h	5.01555	0.00233278
Chd5	1.05355	0.00234311
D630023F18Rik	2.87173	0.00236103
Pim3	1.51505	0.00238093
Bglap3	4.0065	0.00238382
Tubb3	0.810203	0.00238491
1700016L21Rik	2.63353	0.00240553
Maoa	-0.92598	0.00241546
Gabra4	-1.33566	0.00241546
Clpb	-0.450659	0.00241893
Plaat3	-0.801706	0.00241893
Tarbp2	-0.655983	0.00242615
Erc2	-0.965047	0.00245448
Dipk1a	-1.32059	0.00246953
Htra1	6.18909	0.00248214
Fbln2	4.23034	0.00249362
Rhobtb3	-0.720477	0.00250017
Gstt2	0.95716	0.00250887
Gm48914	2.10569	0.00250887
Ina	-0.712549	0.00251403
Mxra8	1.07195	0.00251975
Kirrel3os	-1.54555	0.00255328
Gm15513	5.55491	0.00255475
Tpo	-2.8136	0.00265049
Vegfa	-0.569116	0.00265049
Ptpru	-1.20596	0.00265049
Diras2	-2.4465	0.00265049
C230024C17Rik	1.90632	0.00265049
Gm13068	0.983151	0.00266814
Frs3	0.858402	0.00268584
Ache	1.54074	0.00269435
Zwint	0.970762	0.00270916
Gm42848	5.43875	0.00271854
Slco1a5	1.58289	0.00273098
Mylpf	2.03651	0.00274031
Cyp4f16	0.930869	0.00275216
Gm32365	5.61902	0.00276041
Mapk3	0.763442	0.00277364
Stk39	-0.565648	0.00278891
Gm43353	1.79091	0.00279232
Gm44359	-2.15621	0.00279232
9430041J12Rik	2.3962	0.00282622
Rhox3c	5.56891	0.00284051
5330438D12Rik	0.961798	0.00287561
Plet1	1.92697	0.00288802
Tm7sf2	-0.661949	0.00294256
Tet1	-1.31237	0.00296432
Rgs19	1.52412	0.00297735
Slc36a2	2.5632	0.00298984
Syt12	2.48756	0.00301425
Epha10	3.23076	0.0030277
Wasf1	1.21725	0.00304216
Bscl2	0.683215	0.00305743
Mphosph6	0.926524	0.00308326
Atp8b1	-0.885823	0.00308658
Mfsd9	-1.86403	0.0030956
Prdx4	1.17291	0.00313834
Egfl7	1.60849	0.00315942
Gpc2	2.81553	0.00320434
Pyroxd2	0.864234	0.00321602
Fzd1	1.6697	0.00324215
Tnfrsf22	-1.73358	0.00324813
Cyp4a32	3.2086	0.00324813
1700010B08Rik	2.84238	0.00326129
Nhlrc1	1.12209	0.00327655
4930432E11Rik	5.36961	0.00327655
Myo3a	-1.69768	0.00329414
H2-D1	0.798464	0.00329414
Usp27x	-1.84981	0.00329993
Arhgap25	-4.84178	0.00334663
Psme1	0.677808	0.00338697
Large1	1.45004	0.00340196
Ndrg2	3.08365	0.00341626
Chrna10	3.58045	0.0034383
4930594M22Rik	-1.06005	0.00349652
Cntln	-0.684636	0.00350064
Metrnl	1.60384	0.00350064
Kctd9	-0.651938	0.00351109
Gc	1.67458	0.00351109
Gria3	1.43427	0.00355849
Usp11	1.09049	0.00356209
Tfcp2l1	-1.52695	0.00359673
Klhl22	-0.518047	0.00360213
Olfm1	1.87061	0.00361045
Gm36677	2.22146	0.00361703
Adck5	-0.92219	0.00363619
Colgalt2	-4.28449	0.00363619
4921525O09Rik	1.24864	0.00368167
1700071M16Rik	3.39002	0.00370464
Nme4	-1.68429	0.00372969
4931406C07Rik	-1.03176	0.00375561
Shisa7	2.01193	0.00375561
Plpp3	-1.2106	0.00376116
Gpr162	1.93889	0.00381685
Gm37728	-2.05232	0.00387149
Cilp2	4.2428	0.00390593
Gm15398	4.47114	0.00393475
Tcea3	2.65391	0.00394283
Enoph1	-0.701793	0.00394283
Gm43605	-5.4555	0.00394283
Gm49542	-1.07726	0.00394324
Slc38a5	1.75843	0.00395187
Oacyl	0.959996	0.00397429
Ppfia2	-2.09077	0.00399393
Ace	3.99095	0.00399966
Slc2a2	-1.03962	0.00402477
Dipk2a	-1.05541	0.00402477
4932702P03Rik	-0.864055	0.00402477
Fam13a	2.20503	0.00402888
Rbfox3	1.92799	0.00405218
Nup62cl	2.95115	0.00405264
Myo10	-0.946836	0.00411495
Rbm47	0.446855	0.0041297
Dpp10	-1.45662	0.00415392
Zfp53	0.962354	0.00416292
Apobec1	-0.795304	0.00417944
Gm9530	-1.51899	0.00417944
Apba2	4.91359	0.00419586
Dis3l2	-1.0051	0.0041993
Serping1	3.22625	0.00422618
Fbp2	3.0589	0.00423507
Serpina3n	7.36786	0.00427609
Osbpl5	-1.10005	0.00427609
Gm36543	0.917341	0.00429404
Tdrd3	-1.054	0.00430848
Tmem132b	-1.68232	0.00432075
Fzd7	-1.94763	0.00432736
1700015G11Rik	3.45178	0.00435788
Twist1	5.34398	0.00441307
Mylip	1.55307	0.00443323
Camk2a	5.64579	0.00451036
Nfe2	-4.57275	0.00451036
Zfp575	3.58622	0.00455972
A830018L16Rik	-2.59267	0.0045988
Gjb2	3.18612	0.00460504
Oaf	1.1244	0.00461164
Evpl	-0.881107	0.00473841
4833405L11Rik	5.12591	0.00473841
Kif5c	0.731667	0.00476715
Ccdc126	-1.24718	0.00481263
Fam151b	-1.00167	0.00481557
Adarb2	-1.29335	0.00481557
4933439C10Rik	0.743589	0.00481955
Wdr82	-0.718785	0.00485545
Boc	-1.00118	0.00485545
Sh3tc1	4.18372	0.00485545
Pomgnt2	0.741262	0.00485545
Gm18212	-3.00133	0.00485545
Creld2	1.62741	0.0048637
Tardbp	-0.514495	0.00486466
Paox	0.908922	0.0049301
Pak3	0.903582	0.0049301
Chst7	2.09691	0.00494401
Samd12	-1.52586	0.00511904
Dmkn	-4.91178	0.00512306
Asic1	0.817293	0.00515664
Sel1l3	1.25119	0.00515664
Hfe	-1.12287	0.00518001
Ephx3	3.68696	0.00520681
Chgb	-1.16279	0.00521028
9130023H24Rik	-0.814444	0.00525887
Zbed3	0.816372	0.00530762
Zdhhc23	-1.10198	0.00531627
Gm13110	3.92086	0.00531627
Flrt1	1.0257	0.00532977
Col1a1	3.58313	0.00533347
Btbd19	1.20781	0.00534352
Rap1b	0.849172	0.00534628
Pthlh	2.67216	0.00534644
AW011738	2.1612	0.00536542
Kcnj4	1.71413	0.00539625
Klhl35	1.76653	0.00541586
Gm44732	2.07052	0.00543338
Plin2	1.42337	0.00543404
Cpn1	0.966817	0.00546512
Zfp536	4.48101	0.00546512
Ppp1r26	-1.12171	0.00552411
Ace3	3.39232	0.00552734
1700041G16Rik	3.23786	0.00556557
1700018B08Rik	5.41993	0.00564439
Creb3l3	2.0582	0.00567646
Cldn6	1.12804	0.00571949
Rnf125	-2.42181	0.00572495
Myom1	-1.2755	0.00572805
Rassf5	-1.69091	0.00572805
Gm16712	1.32143	0.00572805
Gm41349	-1.20228	0.00572805
Agbl4	-1.22047	0.00576516
Gm31251	4.43767	0.00576516
Rrm2b	-0.835092	0.00579756
Glrb	-1.34771	0.0058014
Wdr91	0.654652	0.00583364
Gm44744	-3.38533	0.0058397
Ero1b	-1.12395	0.00585055
D930007P13Rik	2.45789	0.00593156
AI197445	4.06627	0.00602997
Gdf11	2.17785	0.00603498
Slc25a33	1.00682	0.00605541
Rasgef1c	3.65514	0.00607482
Gm14409	5.30426	0.00618105
Nab2	2.07515	0.00622033
9030612E09Rik	0.980605	0.00622033
Krt1	1.30446	0.00622288
Lmo2	1.83674	0.00626906
Acap3	0.859755	0.00630611
Il18bp	1.14013	0.00630611
Serpina3h	5.68231	0.0063118
Sfxn3	-0.665175	0.00642537
St7	-0.971894	0.00642537
4933412E12Rik	1.76684	0.00642537
Il18rap	4.38625	0.00651668
Ccdc136	1.15773	0.00653904
Tmem200a	4.23659	0.00653904
Gm26759	-0.897878	0.00658494
Sh3bgrl2	1.42621	0.00669603
Sox12	0.713503	0.00670436
G430095P16Rik	1.30036	0.00674776
C1galt1	-0.577622	0.00681024
Barx2	3.29828	0.00681129
Gm17509	-0.629449	0.00681129
Cdk17	-0.718866	0.00693401
A330093E20Rik	1.13006	0.00703615
Ephx2	1.52459	0.00705143
Syt13	-0.559727	0.00705143
Ebf4	2.14355	0.00705143
Wfikkn2	5.00098	0.00710702
Zdhhc24	0.578507	0.0071126
Lrrc66	-4.63686	0.00715274
Rnf182	-1.09672	0.00717642
Cplx3	2.81088	0.00719238
Ankrd34b	4.37627	0.00723143
Gimap1	2.29029	0.00723952
Ctdnep1	0.70282	0.00729629
Itpr3	-1.04069	0.00729629
Acss2os	-0.836184	0.00732478
Nt5dc2	1.33319	0.00734043
Chn1os3	-0.991839	0.00735392
Mfsd8	-0.708643	0.00736027
Soat1	-0.856501	0.00738315
Rgn	1.32101	0.00741735
9130019O22Rik	1.08273	0.00741739
Cyria	3.04053	0.00743214
Cd151	1.60913	0.00747759
4732491K20Rik	0.86754	0.00747759
Gm13715	-1.78616	0.00752535
AW551984	-1.53657	0.00755087
Slc26a6	-0.971831	0.00758353
Fyb2	3.84731	0.00761323
Catsperg1	1.9635	0.00766739
Rapgef3os1	3.35594	0.00771477
Carmil2	0.727664	0.00772
Gm47392	1.69307	0.00773953
Rnf39	1.97224	0.00774443
Fam210b	-0.787481	0.00779342
Unkl	0.506184	0.00781904
A430027H14Rik	5.70569	0.00781904
Gm12630	-2.66108	0.00782515
Esr1	-1.4867	0.00787768
Hps1	0.497614	0.00791664
Ube2r2	0.689666	0.0079324
H2ac7	-2.0581	0.00802237
Dner	0.909195	0.00811173
Map1lc3a	0.827286	0.0081129
Mtap	-0.578402	0.00813792
Lrrc8e	2.73581	0.00818049
Tat	1.44884	0.00819041
Sord	0.891758	0.00819041
Tmc7	-2.01368	0.00819077
Exog	0.863941	0.00819077
Fam222a	-0.8849	0.00819381
Mpzl3	-1.11678	0.00824055
Gm12404	-0.905971	0.00828686
Gm14444	5.95104	0.00833781
Hr	1.3813	0.00838204
Coprs	1.11491	0.00843576
Slc22a21	1.29764	0.00844872
Plppr4	-0.778204	0.00848315
Gas5	-0.646421	0.00848315
Mgmt	-1.20726	0.00848315
Gm45871	0.802664	0.00848315
Slc6a17	1.35355	0.00850441
A330008L17Rik	-2.15107	0.00865129
Nfix	1.21058	0.00869628
Gm15408	1.8063	0.00869863
Gm39469	1.13034	0.00882319
Cryba2	1.3449	0.00893857
Gm38804	1.11287	0.00897232
Tram1l1	1.28737	0.00899448
Sfxn2	-0.842435	0.00900673
Alkbh2	1.16497	0.00903938
Gm10385	3.34813	0.00915186
Pde9a	4.77608	0.00917127
Mecom	4.41961	0.0094068
Gm4598	-1.61645	0.00949568
Agpat2	0.972013	0.0095333
Tgfa	1.35251	0.0095333
Cadm4	1.13191	0.0095333
Rapgef3os2	3.06259	0.00964805
Tfeb	0.941142	0.00965929
Lysmd3	-0.645377	0.00967126
Clcn2	0.932416	0.00967755
Scube1	3.29938	0.00968656
Ncs1	1.71177	0.00968656
6530437J22Rik	0.874324	0.00968656
Cox6a2	-2.03853	0.00969816
St6gal1	-1.45063	0.00971331
Acacb	2.86433	0.00971331
Gnb5	0.719154	0.00974018
Psd3	-0.672276	0.00975642
Fdps	-2.44816	0.00975642
Mettl27	1.45479	0.00976458
Gm4285	1.05102	0.00976458
Aoc1	5.76952	0.00979289
Xxylt1	-0.690029	0.00979697
Cyp2r1	2.23532	0.00985
Gm28370	1.05245	0.00990023
Limd1	-0.701123	0.00992033
Lrrcc1	-0.69934	0.00992033
AA414768	-0.767786	0.00992033
Gm47009	2.26846	0.00992033
Gm44393	1.79577	0.00999185
Gm15401	1.16654	0.0100684
Gm44928	2.11123	0.0101489
Serpine2	1.71137	0.0101503
Gm6999	-0.89364	0.0102003
Tdrp	-0.815324	0.0102032
Grina	0.717851	0.0102456
Zfp54	0.782074	0.0102941
Pkd1l2	3.04501	0.0104216
Hspb1	1.46497	0.0104637
Fam163b	5.16862	0.0105111
Kank1	-1.09277	0.0105709
Olfr1330	5.14284	0.0106893
Cep41	-1.36446	0.0107347
Nkiras2	0.702195	0.0107404
Ptp4a2	0.528378	0.0107465
Sik1	-1.98781	0.0107545
Tmem184b	0.556456	0.0107625
Gm26716	-2.7809	0.0107953
Hif3a	3.37707	0.0108689
Gm15592	-4.25611	0.0108873
Cpb2	-1.50006	0.0109536
9430064I24Rik	0.875085	0.0109644
Entpd6	-0.659001	0.0109891
Stk33	4.32374	0.0109952
Thnsl1	-0.868174	0.0110104
Eml3	0.755701	0.0110815
Tifab	2.04871	0.0111231
Gal3st1	1.1664	0.0111231
Frg2f1	-1.0252	0.0111325
H4c4	0.760087	0.0111554
Gm15411	2.19836	0.0112454
Cyth4	1.8339	0.0112474
Kcnk5	5.65065	0.0112964
Dyrk2	-0.955075	0.0113411
Isg20	0.873756	0.0113623
Fchsd2	-1.01006	0.0114568
Eif2ak2	1.18444	0.0114714
Slc4a7	-1.02533	0.0114857
Dnajc17	-0.800934	0.0116215
Gm11837	-1.592	0.0116793
Iqch	-2.73634	0.011715
Slc16a10	-0.738821	0.0117213
Eldr	-1.26979	0.0117767
Gm20257	0.714364	0.0118013
Dusp26	1.11266	0.0118737
Ngb	1.54483	0.0118782
Tns1	3.23117	0.0118917
Icosl	2.26413	0.0119457
Pcdh1	0.480903	0.012008
Steap4	8.12345	0.0120839
Lrrc17	2.71426	0.012117
Inhba	1.51162	0.0121284
Nup155	-0.675702	0.0123006
1700086O06Rik	0.75702	0.0123006
Anxa4	0.512117	0.0123206
B3galt1	-1.35782	0.0123206
Itm2c	0.609227	0.0123299
Slc16a12	-0.829503	0.0123453
Gm11460	1.23964	0.0123691
Timp3	2.94785	0.012373
Gm47015	-2.76762	0.0124266
E2f2	-1.00203	0.0124758
Dok5	0.889561	0.0125098
Tspan8	-0.988519	0.0125098
Dhx35	-0.567206	0.0125836
Adgb	-1.11738	0.0125836
Ogfod3	1.18495	0.0125843
Anxa11	-0.818792	0.0126013
Aadat	3.02098	0.0126534
Nbl1	1.34119	0.0126578
Irf2bp2	-1.04055	0.012673
Gm37760	1.14467	0.012764
Iqcb1	0.523084	0.0128869
Nars2	-0.728114	0.0128967
Ap1s2	-0.47304	0.0128967
Ltbp4	2.08113	0.0129232
Bcl2l14	1.12708	0.0129623
Chml	-1.59886	0.0129821
Gm42372	1.63275	0.0129864
Ccl27a	1.25439	0.0130519
Echdc2	-0.879309	0.0130945
Oasl1	4.34098	0.0131352
Gm38287	1.9504	0.0132177
Cnnm1	-1.15367	0.0132514
Acot1	3.12295	0.0132658
Strip2	1.57705	0.0132692
Hapln1	-2.0293	0.013274
Bambi-ps1	-1.58145	0.013274
Etnk2	1.65733	0.0134412
Poglut3	-0.796493	0.013471
Gm30173	1.28457	0.013471
Adap1	2.76853	0.0135001
Thop1	-0.550899	0.0135256
D030055H07Rik	-1.28059	0.0135256
Borcs6	0.948099	0.0135334
Klhl38	1.84087	0.0136152
Meis3	0.977865	0.0136216
Cep112	-1.29634	0.013633
1700095J03Rik	3.59116	0.013633
Gm27196	1.02454	0.0136332
Gm15417	1.03077	0.0136652
Tmem71	1.03033	0.0137602
Lrrtm4	-2.87655	0.0139268
Pacsin1	0.765078	0.0141933
Prkd1	-0.769458	0.0142295
Gm15856	2.0488	0.0142322
Glyctk	-1.17377	0.0142928
Kcnip3	3.01014	0.0142928
BC051142	1.28166	0.0144106
Ccbe1	3.83333	0.0144175
Pou3f1	2.92325	0.0144409
Kcnk13	-2.04567	0.0144923
Efemp2	0.850447	0.0145278
Nap1l1	-0.553522	0.0145401
Fam171b	0.55268	0.0145849
Dnah1	3.55011	0.0146874
Uhrf2	-0.598255	0.0146874
Rin2	-1.27354	0.014697
Psg18	5.60548	0.0147788
Zmynd12	-1.08185	0.0148131
Scn4a	3.03322	0.0148278
Pklr	0.863397	0.0148281
Evc	-2.96263	0.0150116
Nudt2	-0.953607	0.0150483
4930447N08Rik	-0.921945	0.0150483
ENSMUSG00000117901	1.14008	0.0150483
Gm24224	-1.89448	0.0150648
Eif2d	-0.477341	0.0152244
Gm16220	4.35935	0.0152311
Pgrmc1	0.64154	0.0152543
Fads3	2.91289	0.0153319
Adprhl1	3.07343	0.0153425
Myl4	1.38244	0.0153529
Kank4os	5.64382	0.0153624
Ano7	1.44273	0.0153966
Gpld1	0.911325	0.0154498
Dclk1	-1.47626	0.0154498
Zbtb8b	-2.02928	0.0154498
Rpl14	-0.503686	0.0155181
Tmtc2	-1.09785	0.0155707
Fbxw24	-1.16127	0.0155727
Trim65	0.734363	0.0155758
Emb	-0.575868	0.0156018
Shank2	1.65324	0.0156018
Vstm2a	2.21676	0.0156018
Ano9	-0.946429	0.0156018
A930001C03Rik	2.05331	0.0156124
Gm13554	-0.967986	0.0156218
Gm44699	-1.61819	0.0156751
Gm22000	2.69122	0.0157188
Elovl1	0.874531	0.0157906
Zfp786	0.875637	0.0158338
Tmem35b	1.30647	0.0158574
Coro2a	1.1242	0.015867
Gab1	1.28505	0.0158914
Pcdhb20	-0.798014	0.0158914
Agap2	1.21363	0.0159558
Abca8a	-2.9536	0.0159746
Acbd4	0.880134	0.0159792
Gm40040	2.3545	0.0160076
Pqlc3	1.40468	0.0160187
Gm6133	5.20406	0.0160187
Zfp954	0.648636	0.0161292
Slco2a1	1.36063	0.0161791
Mtss1	-0.658531	0.0162032
Rnf20	-0.682371	0.0162032
Grb7	0.735787	0.016244
Cyp4f17	0.70142	0.016309
5031434O11Rik	-1.26395	0.0163223
Ap1g2	0.428953	0.0164835
Tax1bp3	0.706955	0.0164955
Ncapg2	-1.27792	0.0164955
Mir1938	-1.61648	0.0164955
Gm22408	-0.910757	0.0165523
Atp10a	3.15236	0.0167418
Ears2	-0.77535	0.0167418
Erich6	1.24955	0.0167566
Gm10637	-2.35328	0.0167566
E130317F20Rik	-0.612945	0.0168253
Ahcyl2	-0.759672	0.0168432
Adam22	-0.965519	0.0168518
Gm42858	0.653738	0.0169674
Ap3m2	-0.948098	0.0171544
Pgbd5	1.2294	0.0173181
Acss2	-0.736983	0.0173309
Ccdc177	2.29369	0.0173444
Gm47108	2.41544	0.0174321
Camk1g	0.683076	0.0174771
Cyp4b1	1.26158	0.0175422
Dhrs9	4.26044	0.0175659
Gprasp2	1.15101	0.0178419
Utrn	-0.64693	0.0179217
Vsig8	1.59001	0.0179664
Mpv17l	-1.15049	0.017981
5730521K06Rik	-1.85235	0.0180019
Mfge8	1.12462	0.0180539
Gm17141	5.10949	0.0180539
Zbtb7c	-1.07193	0.0180549
Rgs14	-4.57109	0.0180633
Ern2	4.63349	0.0180641
Scg3	0.488436	0.0181853
Crip2	1.17008	0.0182421
Plppr1	0.576917	0.0186122
Crmp1	0.606287	0.0186479
Cntrl	-0.61711	0.0186479
A430035B10Rik	0.912301	0.0186871
Cldn9	2.63528	0.0186983
Tmem217	-1.0207	0.0186983
Tmem179b	0.915601	0.0188837
Gm37915	-1.66797	0.0189196
Mir6381	4.15888	0.0189342
Gm12678	-5.62415	0.0190359
Gm18609	-2.59283	0.0190365
4930526A20Rik	1.19581	0.0191707
Abcb6	1.23136	0.0192532
Fhod3	-0.922538	0.0193589
Gm44421	4.05796	0.0193771
Gm5331	4.97039	0.0194076
Gm13544	1.10763	0.0194341
Syce1	2.03187	0.0194476
Gm12758	-0.845499	0.0194717
Hyal3	1.175	0.0196053
Gm19572	-1.18216	0.0196767
Scaper	-0.631375	0.0197385
Gm16229	2.21104	0.0201264
Inpp4b	1.67369	0.0201675
Gli2	5.72305	0.020172
Tafa5	0.577961	0.020172
E130215H24Rik	5.11095	0.0201795
Ezhip	4.66725	0.020187
Gm17251	0.960523	0.0202067
Crb3	0.997246	0.0202827
Tspo	0.96569	0.0204313
Chst2	3.02619	0.0204911
Dnai3	1.59744	0.0205681
A730061H03Rik	-0.739746	0.0205751
Slc35f1	-0.867704	0.0206482
B4galt4	-1.20607	0.0206532
Slc38a8	1.6076	0.0206974
Gpaa1	0.682761	0.0207062
Gm48789	4.34466	0.0207102
Tmco3	-0.502839	0.0207475
Faah	0.640047	0.0208123
A930031H19Rik	-2.67473	0.0208159
Nynrin	1.21939	0.0208165
Per2	-1.05632	0.0208436
Matn2	-1.1569	0.0208926
Strc	1.43792	0.0208926
Gprc5a	2.0518	0.0208926
Btbd1	0.44948	0.0209492
Usp51	0.916394	0.0209492
Cbln3	3.06956	0.0211517
Gm42723	-0.953973	0.021168
Vmn1r-ps32	4.49715	0.0211714
Crtac1	2.03931	0.0212132
Cfb	2.53779	0.0212578
Arl13b	-0.625485	0.0213297
Spg20	-0.752615	0.0213775
AW112010	1.65411	0.0213898
Ehhadh	-1.1856	0.0213905
Nsg1	0.88482	0.0216187
B430219N15Rik	0.912856	0.0216187
Ebi3	1.49624	0.0216811
Acaa1b	1.37765	0.0216811
Tnfrsf21	-1.4983	0.0216811
Slc45a1	1.86996	0.0216811
Tent5b	1.99538	0.0216811
Fam83e	2.25685	0.0216811
Gm9824	-0.990874	0.0216811
Mhrt	4.1242	0.0216811
Gm9522	3.63539	0.0216811
Prkcz2	0.857284	0.0216811
Suv39h2	-1.51909	0.0217814
1700108N11Rik	-0.926212	0.0217814
Dnaaf9	-0.937396	0.0217946
Mpp3	0.963172	0.0217946
Lgi1	-0.93797	0.021857
Gm25613	-2.29771	0.0218893
2310009B15Rik	0.954628	0.0219342
Aasdh	-0.938239	0.0219757
Insyn2a	-3.7986	0.0219757
D030025P21Rik	2.40231	0.022049
Gnptab	-0.757874	0.0221374
Amy1	4.10001	0.0221374
Gm26682	1.14932	0.0221374
4932442E05Rik	-1.03142	0.0221374
C230057M02Rik	1.63182	0.0221595
Fam171a2	1.14812	0.0221617
Rgs17	1.36926	0.0222263
Tsc22d4	0.708954	0.0222326
Nav2	-0.485628	0.0224876
Gm26592	3.98859	0.0224876
Gm31048	4.06126	0.0224876
AA474408	1.07466	0.0225058
2310022B05Rik	0.523529	0.0225264
Serpina16	4.78141	0.0225264
Gm12802	1.72799	0.0225264
Tldc2	2.25149	0.0225438
Spaca1	0.948812	0.0225941
Gm15351	1.08571	0.0226302
Stab1	1.23696	0.0226367
Phactr2	-1.45089	0.0226371
Vps37d	0.920303	0.0226652
Gad2	-2.27206	0.0227291
Prrt4	2.59561	0.0227599
Gm37531	1.08446	0.0227684
Agfg1	-0.4426	0.0227898
Gm40466	0.702573	0.0227973
Pla2g2f	-0.681643	0.0228773
Septin3	-1.04126	0.0229753
Trub1	-0.615532	0.0229836
Enox2	-0.727009	0.0229836
Gm45546	1.75585	0.0230713
Itgav	-1.09568	0.0231025
Mmab	-0.741814	0.0231095
Gm19437	0.86648	0.0231424
1700112J16Rik	1.30543	0.0231625
Tmem181b-ps	-1.18923	0.0232444
Rbpms2	4.19694	0.0233184
Sgcd	-2.53652	0.0233832
Slc25a29	1.03874	0.0234522
Clic5	-1.64922	0.0234522
Bbs12	-1.18555	0.0234522
Krtap13-1	1.94881	0.0234522
D430040D24Rik	2.04153	0.0234522
Gm13657	4.60807	0.0235341
Aicda	1.44698	0.0235717
Ctu1	0.812398	0.0236813
Gm15764	1.11091	0.0236813
Alox15	-4.97563	0.0238335
Megf10	-3.73135	0.0238335
Gm5124	1.72307	0.0238335
Gm5547	1.5834	0.0238335
Gm16059	0.748401	0.0239139
Slc25a44	0.352385	0.0240229
1700001G17Rik	2.28516	0.0240267
Lmbrd1	0.595924	0.0241338
Exoc1	-0.507317	0.0241551
Gm27440	3.60071	0.0241637
Foxn1	1.23721	0.0242403
Ikzf3	-0.853765	0.0242967
Gltp	1.02868	0.0243146
Cep152	-1.03459	0.024374
Acsl5	-0.699946	0.024382
Gm19026	-2.29848	0.0243944
Hexdc	0.853279	0.0244147
P2ry6	-1.32626	0.0244897
Washc5	-1.15852	0.0246986
8430432A02Rik	1.15568	0.0246986
Gm19589	4.4179	0.0246986
Sh3pxd2a	-0.756713	0.0247173
Plekha8	-0.695355	0.024792
Nipbl	0.522866	0.0248303
1700003F12Rik	2.82384	0.0248303
Gm6374	-0.868751	0.0248475
Gm26947	0.989302	0.0248838
Gm20511	1.98888	0.0249221
Tra2a	-0.718552	0.0249357
Plpp1	1.05294	0.0249631
Stox2	-0.58611	0.0250299
Shisa5	0.86454	0.0251777
Col27a1	2.26478	0.0253423
Gm6566	-0.627816	0.0253423
Zfp397	-0.622728	0.0253764
Kcnh3	0.773337	0.0253764
Wdr25	-0.771744	0.0253764
Snapc1	-0.86799	0.0254177
Pomt1	-0.562033	0.0254177
Gm40513	3.32762	0.0256211
Arid3b	-0.768029	0.0256762
Smim18	1.82225	0.0258124
Hk2	5.22905	0.0258856
Alox12	2.27746	0.0259719
Id4	-1.03577	0.0259849
H2-T3	5.84289	0.0259989
Akap3	2.68359	0.0261649
Gm15767	3.14748	0.0263064
Gm16548	3.68949	0.0263905
Robo2	-1.14728	0.0265312
Gm12766	5.1913	0.0265394
Albfm1	-4.25532	0.0265477
Gm10658	-0.918982	0.0266097
Gm9776	-0.972476	0.0266126
Gm32123	1.59761	0.0266211
Chrna1	3.6261	0.0266361
Slc4a4	-0.976494	0.026658
Fbxw25	-4.01757	0.026658
Dcaf11	-0.409913	0.026673
Vps37c	0.477305	0.0267826
Tcea2	-0.765216	0.0267826
Nck2	-0.682018	0.0268003
Socs1	1.86093	0.0268032
Garre1	-0.842902	0.0268389
A3galt2	2.43548	0.0268779
Gm45708	1.69439	0.0269218
Gm31816	3.68258	0.0269923
Pkia	-0.727567	0.0270451
Mthfd2l	-0.906317	0.0270451
Rpl27-ps2	2.5927	0.0270451
Plcz1	-2.64638	0.0270679
Coro7	0.432801	0.0271745
Pcgf6	0.615217	0.0274838
Gm44418	-1.85509	0.0275111
Ypel3	0.905452	0.0276043
Htatip2	0.574711	0.0276129
Niban1	-1.46603	0.027648
Chd7	-1.44297	0.0276764
Sepsecs	-0.688098	0.0277575
St3gal6	-0.911604	0.0277746
Magi3	-1.39204	0.0278003
Rimbp2	-0.709154	0.0278543
Zfp229	-0.936684	0.0278643
Tmem8b	-1.70003	0.0279693
1700001L19Rik	2.21021	0.0279734
Ddt	0.859941	0.0281947
1700037H04Rik	0.97963	0.0282311
Gm16567	4.80616	0.0283436
9330159M07Rik	-1.92134	0.0283436
Necab1	-1.56234	0.028424
Brf1	-0.581999	0.0284402
F730016J06Rik	4.27763	0.0284798
Rab15	1.51172	0.0284883
AY036118	-1.57284	0.0285097
Trim37	-0.753522	0.0285568
Prelid3a	-1.20298	0.0285568
Fktn	-0.735638	0.0285568
Obscn	2.39151	0.0285568
Serpina3i	4.06676	0.0285568
4933431K14Rik	0.861931	0.0287623
Mettl6	0.463711	0.028979
Oas1b	2.39782	0.029007
Top2b	-1.03532	0.0290567
Ptprk	-1.45924	0.0290682
Dnph1	1.35318	0.0290682
Gm37249	1.20245	0.0290694
St8sia3	0.66511	0.0290795
4930431F10Rik	1.7188	0.0290962
Cd44	0.994617	0.0291284
Vrk1	-0.729055	0.0291284
Ncmap	1.11967	0.0291284
Rrp1b	-0.528455	0.0291284
Fam120b	-0.331027	0.0291569
Tnfrsf26	-3.25527	0.029337
H2-Q6	3.82414	0.0294258
Gm8234	0.824055	0.0294384
Slc7a4	1.07391	0.0294511
Osbp2	1.17843	0.0295073
Mllt6	0.684364	0.0295481
Krt77	2.9972	0.0297636
Tex30	0.631908	0.0298738
Hacd4	-0.684565	0.0299961
Arrdc2	0.562264	0.0299984
Odad4	0.691512	0.0300395
Fam161a	-0.850281	0.0300452
2610318N02Rik	0.937779	0.0301625
Phc2	0.593162	0.0301955
Ccne1	0.89002	0.0302347
Tnfrsf10b	-2.15534	0.0302347
Slc22a5	-0.642579	0.030242
Srrm4	0.897305	0.030242
Atp6v1fnb	4.98954	0.030317
Ptpn1	1.22518	0.0303707
Mrpl38	0.892693	0.0304626
Ntn1	2.97369	0.0304852
Zfp775	0.599304	0.0305035
Asl	1.00398	0.0305642
Esyt3	1.31137	0.0305642
Hs6st3	-0.992674	0.0306664
9330182O14Rik	-2.25433	0.0307794
Apoa2	1.89943	0.0308401
Slc17a5	0.560286	0.0309095
Nalcn	-1.14943	0.0313133
Tnfrsf12a	1.56281	0.0313133
1500011B03Rik	1.10452	0.0313133
Srcin1	3.664	0.0313354
Gm16222	5.02047	0.0313378
Gpr137c	1.37925	0.0316278
Cutal	-0.63186	0.0316324
Gm11799	-4.50691	0.0316324
Prkar1a	-0.439858	0.0318255
Slc25a43	2.06438	0.031849
Arl16	0.765434	0.0319479
1110035H17Rik	0.917925	0.0319479
Teddm2	1.13422	0.032081
Arhgap24	-0.976836	0.0320884
Magi2	0.528623	0.0320976
Sec14l5	1.96439	0.032183
Gm49964	0.78221	0.0322239
Car5b	-1.40467	0.0326383
Gm49477	1.31693	0.0326383
Gm52964	-0.954446	0.0326383
Rad51ap2	-1.17393	0.0326615
Baz1a	1.07342	0.0327053
Aldh9a1	-0.520731	0.0327091
Sez6	1.37609	0.0327167
Mms22l	-1.06201	0.0327167
Gm17056	-1.83209	0.0327167
Art1	2.86839	0.0327708
Gm34299	4.78996	0.0327753
Rps2	-0.590104	0.03288
Gm45605	0.990948	0.03288
Nefm	0.743726	0.0329693
Ankef1	-1.33254	0.0329693
Gtpbp6	0.677348	0.0329754
Gpa33	1.01008	0.0330029
Gm42755	-2.58407	0.0330029
Gm50361	4.78254	0.0330029
Gm18706	1.61989	0.0330491
Gm43751	1.66504	0.0330675
Nova2	0.805273	0.0330725
Spats2	-0.599848	0.0331307
2810021J22Rik	-0.601549	0.0331979
Gm46212	-1.66544	0.0332708
Cep128	-0.968456	0.033272
Gm28438	-1.80934	0.0333033
5330439M10Rik	1.00145	0.0333033
Cenpt	0.71392	0.0333282
Zfp330	-0.433834	0.033395
Gm4013	-1.35422	0.0334274
Myof	-2.63605	0.0334604
Glp1r	-0.988332	0.0334915
Tbc1d5	-0.866128	0.0335188
Aldh2	0.621776	0.0335188
Nebl	-1.79252	0.0335188
Thbs3	0.749801	0.0335546
Ankrd9	1.24092	0.0335572
Arpc1b	0.693049	0.033616
Lrrc14	0.567214	0.0336934
St8sia3os	0.739779	0.0336934
Grb10	-0.843189	0.0338245
Gm48586	-2.36317	0.0340004
Myrf	1.16391	0.0341092
Dusp6	0.724065	0.0341387
Lsp1	-3.66818	0.0341694
Gm34654	-1.43588	0.0341694
Muc13	2.04975	0.0341772
B930018H19Rik	-1.5554	0.0342041
Gm47071	0.498869	0.0342041
Hlcs	-0.823185	0.0342267
Ttll3	-0.776594	0.0342545
Zfp69	-1.17397	0.0344316
Mkrn2os	0.851221	0.0344674
1700030C10Rik	-1.13791	0.0344674
Gm9905	0.823457	0.0345633
Gm47435	3.72115	0.0346084
Tln2	-0.647652	0.0346772
Gm44317	-1.2183	0.0346772
Agpat4	1.51586	0.0347842
Stx18	0.57543	0.0347842
6030443J06Rik	-1.15205	0.034913
Kcnc1	1.5597	0.0350776
Ercc6l2	-0.656843	0.0351461
Gm15629	-2.31553	0.0351489
Snrnp35	-0.884605	0.0351734
Chic1	-0.473672	0.0351734
Ddit3	-0.819858	0.0352844
Mns1	-0.719634	0.0353977
Gstt1	1.14857	0.0355332
4930563E22Rik	-0.695886	0.0355734
Dpf3	-1.13182	0.0355943
4732414G09Rik	1.72556	0.0356717
Prkar1b	0.385871	0.0357415
Ccdc6	0.710267	0.0357415
C1ra	3.05349	0.0357469
Sgsh	-0.75042	0.0357743
Mllt1	-0.54238	0.0357743
9130017K11Rik	1.63774	0.0357743
Rps12	-0.594212	0.0359006
Fam234a	-0.461793	0.0359208
Ak5	-0.741362	0.0359397
Vwf	5.11423	0.0359648
Vdr	-0.452352	0.0359648
Zdhhc16	0.484263	0.0359882
Acot12	1.59741	0.03603
Gm10353	0.609423	0.0360386
Gbp3	2.60151	0.036045
Zfp939	-0.717642	0.0360866
Glul	1.16417	0.0361184
Zcchc7	-0.70761	0.0361184
Orai3	0.551942	0.0361288
9130604C24Rik	1.22467	0.0361288
Il12rb1	2.87897	0.0362705
Arhgap18	-1.02017	0.0362705
Gm15679	-1.52905	0.0363662
Apol7e	-4.56961	0.0364041
Ptpn9	-0.682069	0.0364456
Zfp74	-0.583475	0.0365941
Gm48702	2.04391	0.0366137
Slc39a3	-0.538588	0.0368552
Spaca4	3.59386	0.0368552
Gm9442	2.30391	0.0368831
Tmem120a	0.751912	0.0370005
Gm14798	-0.604334	0.0370736
Hgsnat	0.411896	0.0371179
Tmem52	1.41127	0.0372404
Pik3r3	-0.531929	0.0372404
Kcnab3os	0.806731	0.037252
Ralgds	1.08692	0.0372791
Nucb1	0.533139	0.0372791
Trim14	0.941197	0.0372791
Pdxp	1.33628	0.0372791
Nphp1	-0.491401	0.0373099
Gm47411	-2.1063	0.0373099
3110021N24Rik	0.645026	0.0373252
Slc5a10	0.831325	0.0373411
Slco5a1	2.20118	0.0373507
Hhipl1	-2.5429	0.0373922
Car6	5.1915	0.037446
Plcb4	-0.74875	0.0375581
Crybg3	-0.825447	0.0376025
Ctsb	0.691761	0.0379332
Eln	4.27178	0.0379332
Pus7l	-1.19299	0.0379332
Stx17	-0.618961	0.0379332
Kctd12	0.805316	0.0379332
Ppp1r3e	1.92533	0.0380176
Scd1	2.25692	0.0380757
Leprotl1	0.549712	0.0383121
Igf2bp2	0.975722	0.0383712
Il1rap	-0.897218	0.0383854
Rfx4	2.26011	0.0383894
Gtf3c6	-0.55028	0.0384534
Gm43338	-3.8329	0.0385454
Tmem150cos	-0.808334	0.0386987
Gm44036	0.459016	0.0387057
Serpina3g	3.84079	0.0387336
Mafg	-0.580035	0.0387336
Gm29233	-2.60323	0.0387702
Gm5914	1.37809	0.0387779
Parp8	-0.437298	0.0388944
Gm48283	-1.40011	0.0389438
Zfp946	0.558259	0.0390032
Clk1	-0.753272	0.0390887
Nek3	-0.967869	0.0391112
Il3ra	0.82811	0.0392222
Plxna4os3	5.23801	0.0393073
Nppc	3.48973	0.039365
Nectin2	0.840538	0.0395432
Stx1b	3.06429	0.0397582
BC026762	3.96016	0.0401445
Stx3	0.475372	0.040153
Kif13a	-0.776701	0.0403981
D430019H16Rik	1.45568	0.0403981
Pacs1	-0.631784	0.0404695
Limch1	-0.643844	0.0404941
Trpm4	0.972565	0.0404941
Cpe	0.619549	0.040536
Fam189b	0.562464	0.0406207
Mavs	-0.451009	0.0406207
6530402F18Rik	1.88688	0.0406207
Pstpip1	-3.90558	0.0407053
Capn8	-2.81733	0.0407053
9130213A22Rik	1.42306	0.0407053
Arhgef5	-0.855222	0.0407759
mt-Co2	-0.620048	0.0407759
Entpd5	-1.0058	0.0408217
Gm45024	5.22203	0.0408217
Cyb5rl	0.528261	0.0410917
Dnm3	-0.795933	0.0411066
Tagap	-1.50673	0.0411108
Rhox3d-ps	2.9532	0.0411108
Gm42921	4.8321	0.0411546
Pamr1	0.775729	0.0412048
Fam53b	-1.23626	0.0412048
BC024063	0.69233	0.0412048
9430069I07Rik	-1.05241	0.0413081
Ngfr	1.35714	0.0414821
Nrep	-1.0909	0.0414821
Krtap14	2.76959	0.0414821
Gm42944	0.738364	0.0414821
Gm27169	-3.66118	0.0415457
Dock5	-1.4558	0.0416133
2400006E01Rik	2.60491	0.0416731
Gria2	0.968058	0.0416973
Gm16124	0.697043	0.0416973
Chat	4.99486	0.0417059
S100a10	-0.981493	0.0417845
Gm6983	1.76796	0.0418718
Gm37174	1.18083	0.0419965
Eps15	-0.871671	0.0420089
Nat10	-0.647196	0.0420976
Ephb3	2.87347	0.0421787
Klb	1.19795	0.0421787
Gm7040	-1.79669	0.042188
Sez6l	-0.866019	0.0422357
Gcnt4	2.54883	0.0422588
Htr1d	1.90722	0.0422976
Gldc	0.895382	0.0423024
Slc16a2	-1.38535	0.0423024
Arhgap31	1.07851	0.0424142
Mmp15	1.24596	0.0424415
[truncated: 21,197 more rows]

## Sheet: Pdx1 bound-Chd4DB DEG overlap
Supplemental Table 3				DAVID GO anlayses of 385 gene overlap
Pdx1 bound overlap with DEG Chd4Db genes
gene	log_fc_value	gene_symbol		Term	Count	%	P-Value	-log(p-value)
ENSMUSG00000038415	-6.97281	Foxq1		nervous system development	21	5.6	3.3e-05	4.48149
ENSMUSG00000029608	-4.89035	Rph3a		brain development	14	3.7	0.00024	3.61979
ENSMUSG00000041293	-4.87385	Adgrf1		regulation ion transmem. transport	11	2.9	0.00024	3.61979
ENSMUSG00000027861	-4.28923	Casq2		signal transduction	41	10.9	0.00075	3.12494
ENSMUSG00000041301	-3.89278	Cftr		cell adhesion	21	5.6	0.00091	3.04096
ENSMUSG00000038156	-3.65714	Spon1		protein dephosphorylation	10	2.7	0.0012	2.92082
ENSMUSG00000046922	-3.42145	Gpr6		transmembrane transport	17	4.5	0.0015	2.82391
ENSMUSG00000045092	-3.38933	S1pr1		small GTPase mediated signal transduction	13	3.4	0.0018	2.74473
ENSMUSG00000025020	-3.31804	Slit1		regulation of K+ ion transmem. transport	4	1.1	0.0025	2.60206
ENSMUSG00000052085	-3.14405	Dock8		response to lipopolysaccharide	11	2.9	0.0042	2.37675
ENSMUSG00000020672	-2.91052	Sntg2		hormone secretion	3	0.8	0.005	2.30103
ENSMUSG00000038599	-2.81733	Capn8
ENSMUSG00000029819	-2.73794	Npy
ENSMUSG00000004952	-2.68143	Rasa4
ENSMUSG00000050944	-2.66072	Efcab5
ENSMUSG00000030230	-2.64638	Plcz1
ENSMUSG00000026185	-2.64511	Igfbp5
ENSMUSG00000030075	-2.55645	Cntn3
ENSMUSG00000020354	-2.53652	Sgcd
ENSMUSG00000059743	-2.44816	Fdps
ENSMUSG00000040125	-2.35234	Gpr26
ENSMUSG00000073758	-2.33084	Sh3d21
ENSMUSG00000024135	-2.32372	Srbd1
ENSMUSG00000033826	-2.31061	Dnah8
ENSMUSG00000061126	-2.26455	Cyp4f39
ENSMUSG00000029659	-2.18624	Medag
ENSMUSG00000026443	-2.17367	Lrrn2
ENSMUSG00000016239	-2.10086	Lonrf3
ENSMUSG00000045404	-2.04567	Kcnk13
ENSMUSG00000021613	-2.0293	Hapln1
ENSMUSG00000042246	-2.01368	Tmc7
ENSMUSG00000024042	-1.98781	Sik1
ENSMUSG00000063558	-1.96232	Aox1
ENSMUSG00000059146	-1.92795	Ntrk3
ENSMUSG00000049907	-1.92695	Rasl11b
ENSMUSG00000028399	-1.88853	Ptprd
ENSMUSG00000040181	-1.86174	Fmo1
ENSMUSG00000020614	-1.85091	Fam20a
ENSMUSG00000024043	-1.83877	Arhgap28
ENSMUSG00000020623	-1.83823	Map2k6
ENSMUSG00000032036	-1.83708	Kirrel3
ENSMUSG00000053702	-1.79252	Nebl
ENSMUSG00000020389	-1.78415	Cdkl3
ENSMUSG00000032020	-1.7732	Ubash3b
ENSMUSG00000103770	-1.7435	Pcdha9
ENSMUSG00000025716	-1.69768	Myo3a
ENSMUSG00000042476	-1.68096	Abcb4
ENSMUSG00000026321	-1.67675	Tnfrsf11a
ENSMUSG00000035561	-1.67315	Aldh1b1
ENSMUSG00000028289	-1.66943	Epha7
ENSMUSG00000041912	-1.65996	Tdrkh
ENSMUSG00000095105	-1.65933	Edaradd
ENSMUSG00000026110	-1.63882	Mgat4a
ENSMUSG00000027525	-1.61651	Phactr3
ENSMUSG00000037962	-1.59746	Rflna
ENSMUSG00000058488	-1.57681	Kl
ENSMUSG00000036510	-1.55506	Cdh8
ENSMUSG00000074743	-1.54969	Thbd
ENSMUSG00000046637	-1.54739	Ttc34
ENSMUSG00000052387	-1.54025	Trpm3
ENSMUSG00000026380	-1.52695	Tfcp2l1
ENSMUSG00000058656	-1.52586	Samd12
ENSMUSG00000041633	-1.52362	Kctd12b
ENSMUSG00000047591	-1.51825	Mafa
ENSMUSG00000023915	-1.4983	Tnfrsf21
ENSMUSG00000019768	-1.4867	Esr1
ENSMUSG00000038860	-1.48317	Garnl3
ENSMUSG00000027797	-1.47626	Dclk1
ENSMUSG00000034265	-1.47204	Zdhhc14
ENSMUSG00000026483	-1.46603	Fam129a
ENSMUSG00000019889	-1.45924	Ptprk
ENSMUSG00000036815	-1.45662	Dpp10
ENSMUSG00000044447	-1.4558	Dock5
ENSMUSG00000022885	-1.45063	St6gal1
ENSMUSG00000009292	-1.44627	Trpm2
ENSMUSG00000037824	-1.42305	Tspan14
ENSMUSG00000060206	-1.40876	Zfp462
ENSMUSG00000060579	-1.40088	Fhit
ENSMUSG00000002107	-1.40038	Celf2
ENSMUSG00000033209	-1.3964	Ttc28
ENSMUSG00000052539	-1.39204	Magi3
ENSMUSG00000020262	-1.38118	Adarb1
ENSMUSG00000024542	-1.35959	Cep192
ENSMUSG00000042359	-1.35942	Osbpl6
ENSMUSG00000030498	-1.35562	Gas2
ENSMUSG00000028020	-1.34771	Glrb
ENSMUSG00000030064	-1.34735	Frmd4b
ENSMUSG00000074771	-1.33254	Ankef1
ENSMUSG00000048779	-1.32626	P2ry6
ENSMUSG00000029270	-1.32059	Dipk1a
ENSMUSG00000026098	-1.31767	Pms1
ENSMUSG00000053870	-1.30648	Fpgt
ENSMUSG00000020728	-1.29634	Cep112
ENSMUSG00000052551	-1.29335	Adarb2
ENSMUSG00000015829	-1.29107	Tnr
ENSMUSG00000039087	-1.28971	Rreb1
ENSMUSG00000026107	-1.27552	Nabp1
ENSMUSG00000024049	-1.2755	Myom1
ENSMUSG00000001768	-1.27354	Rin2
ENSMUSG00000037366	-1.26656	Pafah2
ENSMUSG00000042655	-1.26082	Shisal2b
ENSMUSG00000041895	-1.24281	Wipi1
ENSMUSG00000032456	-1.22994	Nmnat3
ENSMUSG00000061298	-1.22047	Agbl4
ENSMUSG00000054612	-1.20726	Mgmt
ENSMUSG00000028909	-1.20596	Ptpru
ENSMUSG00000019990	-1.19667	Pde7b
ENSMUSG00000022853	-1.1856	Ehhadh
ENSMUSG00000027350	-1.16279	Chgb
ENSMUSG00000022350	-1.15852	Washc5
ENSMUSG00000022324	-1.1569	Matn2
ENSMUSG00000026627	-1.15556	Pacc1
ENSMUSG00000025189	-1.15367	Cnnm1
ENSMUSG00000056158	-1.15106	Car10
ENSMUSG00000000197	-1.14943	Nalcn
ENSMUSG00000046157	-1.14807	Tmem229b
ENSMUSG00000052516	-1.14728	Robo2
ENSMUSG00000021194	-1.14588	Chga
ENSMUSG00000049336	-1.14214	Tenm2
ENSMUSG00000021221	-1.13182	Dpf3
ENSMUSG00000057069	-1.12395	Ero1lb
ENSMUSG00000056486	-1.11369	Chn1
ENSMUSG00000037606	-1.10005	Osbpl5
ENSMUSG00000020151	-1.09922	Ptprr
ENSMUSG00000036019	-1.09785	Tmtc2
ENSMUSG00000044164	-1.09672	Rnf182
ENSMUSG00000027087	-1.09568	Itgav
ENSMUSG00000032702	-1.09277	Kank1
ENSMUSG00000045053	-1.09174	Kcng3
ENSMUSG00000042834	-1.0909	Nrep
ENSMUSG00000043671	-1.09089	Dpy19l3
ENSMUSG00000044646	-1.07193	Zbtb7c
ENSMUSG00000055866	-1.05632	Per2
ENSMUSG00000028689	-1.05618	Ccdc163
ENSMUSG00000022892	-1.04876	App
ENSMUSG00000025986	-1.04714	Slc39a10
ENSMUSG00000063870	-1.04428	Chd4
ENSMUSG00000027690	-1.03962	Slc2a2
ENSMUSG00000021379	-1.03577	Id4
ENSMUSG00000017485	-1.03532	Top2b
ENSMUSG00000037243	-1.02841	Zfp692
ENSMUSG00000025429	-1.02715	Pstpip2
ENSMUSG00000024357	-1.02635	Sil1
ENSMUSG00000039031	-1.02017	Arhgap18
ENSMUSG00000020451	-1.01363	Limk2
ENSMUSG00000061838	-1.0099	Suclg2
ENSMUSG00000048899	-1.00776	Rimkla
ENSMUSG00000053333	-1.0051	Dis3l2
ENSMUSG00000041625	-1.00343	Ggact
ENSMUSG00000022687	-1.00118	Boc
ENSMUSG00000025533	1.00398	Asl
ENSMUSG00000038319	1.00604	Kcnh2
ENSMUSG00000028982	1.00682	Slc25a33
ENSMUSG00000059142	1.01752	Zfp945
ENSMUSG00000006360	1.02083	Crip1
ENSMUSG00000047787	1.0257	Flrt1
ENSMUSG00000036944	1.03033	Tmem71
ENSMUSG00000021759	1.05294	Plpp1
ENSMUSG00000005045	1.05355	Chd5
ENSMUSG00000055782	1.07999	Abcd2
ENSMUSG00000026821	1.08692	Ralgds
ENSMUSG00000050711	1.09718	Scg2
ENSMUSG00000022037	1.10834	Clu
ENSMUSG00000049349	1.10884	Gm5105
ENSMUSG00000039661	1.11266	Dusp26
ENSMUSG00000038034	1.12882	Igsf8
ENSMUSG00000000296	1.14052	Tpd52l1
ENSMUSG00000032300	1.14079	1700017B05Rik
ENSMUSG00000001663	1.14857	Gstt1
ENSMUSG00000026473	1.16417	Glul
ENSMUSG00000044339	1.16497	Alkbh2
ENSMUSG00000049721	1.1664	Gal3st1
ENSMUSG00000006356	1.17008	Crip2
ENSMUSG00000033707	1.17242	Lrrc24
ENSMUSG00000073433	1.179	Arhgdig
ENSMUSG00000025169	1.18495	Ogfod3
ENSMUSG00000040938	1.18638	Slc16a11
ENSMUSG00000024640	1.18921	Psat1
ENSMUSG00000029195	1.19795	Klb
ENSMUSG00000022969	1.20231	Il10rb
ENSMUSG00000001911	1.21058	Nfix
ENSMUSG00000041135	1.21081	Ripk2
ENSMUSG00000020072	1.21126	Pbld2
ENSMUSG00000019831	1.21725	Wasf1
ENSMUSG00000039145	1.21959	Camk1d
ENSMUSG00000027540	1.22518	Ptpn1
ENSMUSG00000020253	1.23578	Ppm1m
ENSMUSG00000022208	1.25086	Jph4
ENSMUSG00000051435	1.26154	Fhad1
ENSMUSG00000031897	1.28889	Psmb10
ENSMUSG00000022489	1.3108	Pde1b
ENSMUSG00000023070	1.32101	Rgn
ENSMUSG00000116165	1.33628	Pdxp
ENSMUSG00000055799	1.34349	Tcf7l1
ENSMUSG00000006546	1.3449	Cryba2
ENSMUSG00000033088	1.34747	Triobp
ENSMUSG00000029999	1.35251	Tgfa
ENSMUSG00000027894	1.35355	Slc6a17
ENSMUSG00000000120	1.35714	Ngfr
ENSMUSG00000032548	1.36063	Slco2a1
ENSMUSG00000027215	1.37628	Cd82
ENSMUSG00000061086	1.38244	Myl4
ENSMUSG00000010051	1.38727	Hyal1
ENSMUSG00000030787	1.3932	Lyve1
ENSMUSG00000032091	1.40434	Tmprss4
ENSMUSG00000045679	1.40468	Pqlc3
ENSMUSG00000030621	1.4311	Me3
ENSMUSG00000059013	1.43223	Sh2d3c
ENSMUSG00000001670	1.44884	Tat
ENSMUSG00000004383	1.45004	Large1
ENSMUSG00000094910	1.45568	D430019H16Rik
ENSMUSG00000004951	1.46497	Hspb1
ENSMUSG00000052852	1.46707	Reep1
ENSMUSG00000070436	1.48941	Serpinh1
ENSMUSG00000022176	1.49866	Rem2
ENSMUSG00000020891	1.5064	Alox8
ENSMUSG00000041324	1.51162	Inhba
ENSMUSG00000035828	1.51505	Pim3
ENSMUSG00000023827	1.51586	Agpat4
ENSMUSG00000029602	1.52059	Rasal1
ENSMUSG00000037159	1.52151	Wee2
ENSMUSG00000054200	1.5451	Ffar4
ENSMUSG00000038175	1.55307	Mylip
ENSMUSG00000058975	1.5597	Kcnc1
ENSMUSG00000048240	1.55972	Gng7
ENSMUSG00000039629	1.57705	Strip2
ENSMUSG00000063975	1.58289	Slco1a5
ENSMUSG00000023272	1.62741	Creld2
ENSMUSG00000025964	1.63877	Adam23
ENSMUSG00000052584	1.65544	Serp2
ENSMUSG00000034226	1.65698	Rhov
ENSMUSG00000070644	1.65733	Etnk2
ENSMUSG00000035540	1.67458	Gc
ENSMUSG00000033316	1.67728	Galnt9
ENSMUSG00000023911	1.68039	Flywch2
ENSMUSG00000006435	1.69166	Neurl1a
ENSMUSG00000041889	1.6982	Shisa4
ENSMUSG00000062859	1.69955	Tcp11
ENSMUSG00000026249	1.71137	Serpine2
ENSMUSG00000036111	1.76435	Lmo1
ENSMUSG00000035298	1.76653	Klhl35
ENSMUSG00000028307	1.79694	Aldob
ENSMUSG00000018339	1.80445	Gpx3
ENSMUSG00000028370	1.82272	Pappa
ENSMUSG00000032076	1.83802	Cadm1
ENSMUSG00000022357	1.84087	Klhl38
ENSMUSG00000060678	1.85169	H4c3
ENSMUSG00000039838	1.86996	Slc45a1
ENSMUSG00000079499	1.88688	6530402F18Rik
ENSMUSG00000024736	1.89608	Tmem132a
ENSMUSG00000005681	1.89943	Apoa2
ENSMUSG00000032068	1.92697	Plet1
ENSMUSG00000029516	1.98606	Cit
ENSMUSG00000002020	1.98642	Ltbp2
ENSMUSG00000032577	1.99077	Mapkapk3
ENSMUSG00000031980	1.99477	Agt
ENSMUSG00000046694	1.99538	Tent5b
ENSMUSG00000053550	2.01193	Shisa7
ENSMUSG00000022824	2.04975	Muc13
ENSMUSG00000037138	2.05137	Aff3
ENSMUSG00000046733	2.0518	Gprc5a
ENSMUSG00000040488	2.08113	Ltbp4
ENSMUSG00000022574	2.11603	Naprt
ENSMUSG00000053552	2.14355	Ebf4
ENSMUSG00000045288	2.15443	Ush1g
ENSMUSG00000058099	2.15806	Nfam1
ENSMUSG00000031635	2.16054	Anxa10
ENSMUSG00000024990	2.16755	Rbp4
ENSMUSG00000022842	2.18509	Ece2
ENSMUSG00000020865	2.19596	Abcc3
ENSMUSG00000024059	2.23047	Clip4
ENSMUSG00000030670	2.23532	Cyp2r1
ENSMUSG00000054976	2.23732	Nyap2
ENSMUSG00000028444	2.25404	Cntfr
ENSMUSG00000020037	2.26011	Rfx4
ENSMUSG00000045672	2.26478	Col27a1
ENSMUSG00000037411	2.27479	Serpine1
ENSMUSG00000032523	2.31905	Hhatl
ENSMUSG00000031574	2.3208	Star
ENSMUSG00000045534	2.3462	Kcna5
ENSMUSG00000047363	2.36051	Cstad
ENSMUSG00000026773	2.39278	Pfkfb3
ENSMUSG00000092130	2.40231	D030025P21Rik
ENSMUSG00000000214	2.4105	Th
ENSMUSG00000010086	2.41165	Rnf112
ENSMUSG00000041548	2.42167	Hspb8
ENSMUSG00000024084	2.42677	Qpct
ENSMUSG00000015354	2.44141	Pcolce2
ENSMUSG00000010066	2.44879	Cacna2d2
ENSMUSG00000046997	2.48771	Spsb4
ENSMUSG00000029830	2.49122	Svopl
ENSMUSG00000038387	2.49787	Rras
ENSMUSG00000027489	2.51314	Necab3
ENSMUSG00000040856	2.60805	Dlk1
ENSMUSG00000034762	2.62394	Glis1
ENSMUSG00000020227	2.64864	Irak3
ENSMUSG00000022809	2.65117	Nr1i2
ENSMUSG00000027339	2.65648	Rassf2
ENSMUSG00000038352	2.67083	Arl5c
ENSMUSG00000048776	2.67216	Pthlh
ENSMUSG00000028121	2.69379	Bcar3
ENSMUSG00000024386	2.78674	Proc
ENSMUSG00000039714	2.81088	Cplx3
ENSMUSG00000034990	2.81902	Otoa
ENSMUSG00000038523	2.82384	1700003F12Rik
ENSMUSG00000005958	2.87347	Ephb3
ENSMUSG00000015709	2.89444	Arnt2
ENSMUSG00000020902	2.97369	Ntn1
ENSMUSG00000037161	2.9986	Mgarp
ENSMUSG00000079056	3.01014	Kcnip3
ENSMUSG00000001027	3.03322	Scn4a
ENSMUSG00000063535	3.05568	Zfp773
ENSMUSG00000021456	3.0589	Fbp2
ENSMUSG00000027661	3.06863	Slc2a10
ENSMUSG00000035273	3.0785	Hpse
ENSMUSG00000037370	3.08472	Enpp1
ENSMUSG00000028862	3.09636	Map3k6
ENSMUSG00000042671	3.10849	Rgs8
ENSMUSG00000003476	3.1276	Crhr2
ENSMUSG00000030946	3.17091	Lhpp
ENSMUSG00000029359	3.19535	Tesc
ENSMUSG00000044349	3.26277	Snhg11
ENSMUSG00000056973	3.29036	Ces1d
ENSMUSG00000067786	3.29086	Nnat
ENSMUSG00000032033	3.29828	Barx2
ENSMUSG00000035314	3.3077	Gdpd5
ENSMUSG00000006204	3.33898	Cdcp3
ENSMUSG00000031837	3.34139	Necab2
ENSMUSG00000022181	3.41575	C6
ENSMUSG00000000753	3.50066	Serpinf1
ENSMUSG00000064246	3.5036	Chil1
ENSMUSG00000034472	3.50457	Rasd2
ENSMUSG00000005672	3.537	Kit
ENSMUSG00000021136	3.54023	Smoc1
ENSMUSG00000031384	3.56803	Asb9
ENSMUSG00000037362	3.58331	Ccn3
ENSMUSG00000113769	3.60293	5033406O09Rik
ENSMUSG00000039405	3.63411	Prss23
ENSMUSG00000020374	3.65514	Rasgef1c
ENSMUSG00000038453	3.664	Srcin1
ENSMUSG00000026255	3.75607	Efhd1
ENSMUSG00000026417	3.82995	Pigr
ENSMUSG00000046318	3.83333	Ccbe1
ENSMUSG00000041248	4.01791	Kcnj1
ENSMUSG00000055003	4.02122	Lrtm2
ENSMUSG00000010064	4.03229	Slc38a3
ENSMUSG00000024140	4.04952	Epas1
ENSMUSG00000036553	4.18372	Sh3tc1
ENSMUSG00000068196	4.21362	Col8a1
ENSMUSG00000028776	4.24245	Tinagl1
ENSMUSG00000086425	4.27763	F730016J06Rik
ENSMUSG00000020431	4.30621	Adcy1
ENSMUSG00000031027	4.32374	Stk33
ENSMUSG00000017652	4.36091	Cd40
ENSMUSG00000026068	4.38625	Il18rap
ENSMUSG00000016024	4.40548	Lbp
ENSMUSG00000027684	4.41961	Mecom
ENSMUSG00000043456	4.48101	Zfp536
ENSMUSG00000024388	4.4896	Myo7b
ENSMUSG00000018862	4.4929	Otop3
ENSMUSG00000030244	4.54895	Gys2
ENSMUSG00000030866	4.63349	Ern2
ENSMUSG00000020388	4.87773	Pdlim4
ENSMUSG00000030519	4.91359	Apba2
ENSMUSG00000066189	4.93563	Cacng3
ENSMUSG00000027221	4.97592	Chst1
ENSMUSG00000021919	4.99486	Chat
ENSMUSG00000044177	5.00098	Wfikkn2
ENSMUSG00000029368	5.0382	Alb
ENSMUSG00000024907	5.09817	Gal
ENSMUSG00000025478	5.09974	Dpysl4
ENSMUSG00000001930	5.11423	Vwf
ENSMUSG00000038412	5.26056	Higd1a
ENSMUSG00000032207	5.37675	Lipc
ENSMUSG00000009487	5.38191	Otog
ENSMUSG00000009614	5.42031	Sardh
ENSMUSG00000029765	5.64996	Plxna4
ENSMUSG00000021750	5.78322	Fam107a
ENSMUSG00000022468	6.02663	Endou
ENSMUSG00000023078	6.06662	Cxcl13
ENSMUSG00000056481	6.13528	Cd248
ENSMUSG00000022103	6.18348	Gfra2
ENSMUSG00000036596	6.58346	Cpz
ENSMUSG00000070708	6.7157	Gtsf1l
ENSMUSG00000058183	6.95664	Mmel1
